# Supplementary material for: The molecular basis of socially induced egg-size plasticity in honey bees
Source: eLife. 2022 Nov 8;11:e80499. doi: 10.7554/eLife.80499 (PMC9747152; doi:10.7554/eLife.80499)
Supplement: Figure 1—source data 1. [file elife-80499-fig1-data1.xlsx]

## Sheet: Sheet1
Queen	1	2	3	4	5	6	7	8	9	10	11	12	13	14	15	16	17	18	19	20
Q1
Q1_M1	0.58283	0.58636	0.604705	0.58706	0.58973	0.576155	0.48547	0.59293	0.57928	0.58822	0.586755	0.60185	0.594125	0.565625	0.592305	0.599965	0.59819	0.580525	0.569265	0.58636
Q1_M2	0.57015	0.588685	0.57238	0.622765	0.573515	0.55444	0.60026	0.59173	0.57901	0.578745	0.589535	0.556075	0.58271	0.60484	0.57969	0.583965	0.615575	0.56429	0.587385	0.5971
Q1_S1	0.6361	0.631315	0.623135	0.623785	0.59926	0.629245	0.62078	0.61233	0.62411	0.628965	0.61407	0.62729	0.61809	0.607195	0.614745	0.615695	0.6083	0.65305	0.638195	0.59994
Q1_S2	0.63084	0.632345	0.63735	0.63143	0.61309	0.60243	0.656075	0.62269	0.59615	0.60443	0.61707	0.617755	0.60857	0.60406	0.603415	0.623425	0.589175	0.60347	0.630665	0.59743
Q1_L1	0.577622	0.563693	0.585451	0.575917	0.562116	0.535296	0.548658	0.575071	0.565588	0.539532	0.566733	0.558675	0.548124	0.580954	0.538234	0.53583	0.543774	0.555171	0.542801	0.567032
Q1_L2	0.546349	0.577189	0.554745	0.518016	0.556793	0.542514	0.541592	0.588205	0.578213	0.574531	0.555457	0.566625	0.544372	0.562135	0.53604	0.587066	0.550852	0.550706	0.541007	0.532154
Q3
Q3_M1	0.531295	0.540115	0.524925	0.62047	0.52344	0.518485	0.52477	0.515155	0.539635	0.54297	0.52051	0.51584	0.51691	0.502925	0.522965	0.5314	0.517675	0.547035	0.51496	0.543875
Q3_M2	0.568595	0.562495	0.557004	0.588705	0.573015	0.64367	0.546835	0.576995	0.575855	0.55423	0.580705	0.5779	0.567455	0.57045	0.55808	0.596735	0.58866	0.56646	0.53922	0.574885
Q3_L1	0.56087	0.517935	0.504025	0.524635	0.541645	0.542645	0.50992	0.518175	0.54589	0.52134	0.534815	0.635735	0.56105	0.54676	0.65443	0.551025	0.531865	0.52968	0.523335	0.528655
Q3_L2	0.545915	0.549025	0.56014	0.563295	0.552185	0.507405	0.549375	0.556565	0.5474	0.55294	0.533095	0.545835	0.48488	0.549345	0.575865	0.56307	0.51178	0.55754	0.53555	0.55903
Q3_S1	0.660276	0.756229	0.666394	0.620354	0.639199	0.636852	0.62875	0.62798	0.643206	0.659373	0.651576	0.662299	0.663672	0.591499	0.621582	0.682231	0.643028	0.630473	0.653331	0.65045
Q3_S2	0.645152	0.634601	0.612983	0.631421	0.650234	0.64804	0.624768	0.617734	0.6107	0.635847	0.623649	0.644306	0.636032	0.621436	0.630855	0.62141	0.626823	0.641317	0.60123	0.587613
Q5
Q5_M1	0.56515	0.571855	0.57527	0.573805	0.5957	0.543505	0.55341	0.559895	0.55969	0.569715	0.559325	0.54448	0.5434	0.562995	0.595025	0.59364	0.57744	0.584615	0.553845	0.551185
Q5_M2	0.59344	0.60821	0.581095	0.6022	0.62149	0.591865	0.54545	0.549625	0.570615	0.585745	0.59418	0.578	0.60737	0.586485	0.60858	0.59391	0.57623	0.578885	0.64196	0.588185
Q5_S1	0.63727	0.65103	0.636145	0.641175	0.63685	0.621855	0.63781	0.633745	0.630915	0.64437	0.63335	0.615995	0.62563	0.63736	0.650205	0.600215	0.61071	0.628105	0.629595	0.623405
Q5_S2	0.651915	0.66039	0.66143	0.67015	0.663465	0.63578	0.63174	0.640365	0.63651	0.64781	0.60157	0.64248	0.63256	0.6733	0.62115	0.69136	0.636845	0.65478	0.633575	0.632615
Q5_L1	0.573608	0.515758	0.539894	0.557664	0.555635	0.535455	0.546356	0.555114	0.554439	0.559318	0.55187	0.556182	0.569093	0.543685	0.516248	0.538285	0.542056	0.551577	0.548429	0.57329
Q5_L2	0.537458	0.561594	0.558427	0.547959	0.56314	0.548257	0.570581	0.581018	0.576871	0.542203	0.563604	0.566002	0.534717	0.568686	0.557976	0.559909	0.560195	0.651296	0.56728	0.553485
Q10
Q10_M1	0.587995	0.61088	0.60126	0.57435	0.60277	0.58964	0.597555	0.60673	0.611215	0.592365	0.55808	0.5598	0.61043	0.59586	0.562195	0.609135	0.595685	0.610055	0.580085	0.59272
Q10_M2	0.59288	0.625755	0.548565	0.627135	0.61252	0.62413	0.61118	0.62086	0.63081	0.6151	0.60264	0.607555	0.60244	0.627825	0.584195	0.62247	0.6081	0.62107	0.54073	0.598935
Q10_S1	0.648525	0.65375	0.694365	0.645845	0.656665	0.69225	0.70987	0.674845	0.69212	0.66466	0.6763	0.69436	0.70948	0.67407	0.641045	0.68789	0.691465	0.69494	0.716115	0.70991
Q10_S2	0.68695	0.674965	0.69581	0.68155	0.652505	0.648955	0.647835	0.695725	0.67416	0.661955	0.679085	0.64756	0.6851	0.67754	0.69346	0.664365	0.679725	0.704855	0.68739	0.67643
Q11
Q11_M1	0.54854	0.539635	0.543835	0.460205	0.542475	0.52873	0.569005	0.547225	0.54814	0.576665	0.56313	0.540915	0.51691	0.549095	0.551565	0.518145	0.46452	0.570835	0.533455	0.56639
Q11_M2	0.550655	0.551255	0.57088	0.56219	0.546955	0.573425	0.557865	0.564615	0.557485	0.56691	0.539015	0.578305	0.588125	0.583105	0.540945	0.565345	0.56066	0.55458	0.54894	0.56119
Q11_L1	0.52654	0.51569	0.522595	0.561075	0.55058	0.551725	0.57486	0.525895	0.54735	0.564345	0.57226	0.540505	0.54472	0.547955	0.537995	0.548345	0.528645	0.562815	0.56129	0.545355
Q11_L2	0.52185	0.56318	0.522625	0.52232	0.52668	0.51447	0.567715	0.561905	0.546165	0.545685	0.52194	0.529975	0.4993	0.53781	0.545525	0.55044	0.54464	0.54492	0.55108	0.54696
Q12
Q12_M1	0.568285	0.549735	0.537435	0.5391	0.523615	0.51076	0.54506	0.51177	0.542875	0.557895	0.543865	0.537345	0.55488	0.55144	0.511865	0.57231	0.580365	0.56699	0.554355	0.535145
Q12_M2	0.622205	0.58424	0.568165	0.61614	0.583215	0.562135	0.57663	0.58859	0.61138	0.604595	0.60636	0.583085	0.60054	0.586375	0.62622	0.594295	0.59472	0.58243	0.595765	0.61423
Q12_S1	0.62853	0.649295	0.64229	0.63007	0.66049	0.643035	0.687885	0.62814	0.6571	0.631105	0.699225	0.62874	0.64135	0.62181	0.65015	0.63462	0.637985	0.642475	0.6273	0.64388
Q12_S2	0.687885	0.69104	0.635035	0.67172	0.65358	0.665795	0.70412	0.721015	0.67797	0.688625	0.672035	0.689135	0.691185	0.67821	0.69393	0.696425	0.68374	0.647165	0.67334	0.676345
Q12_L1	0.541758	0.537382	0.510473	0.533496	0.53985	0.53057	0.55318	0.514798	0.543736	0.508024	0.558573	0.543093	0.53368	0.549027	0.522964	0.5366	0.529165	0.545803	0.513723	0.509595
Q12_L2	0.532637	0.537821	0.57324	0.553307	0.505194	0.519568	0.545554	0.4806	0.48745	0.550782	0.510225	0.563013	0.538527	0.527988	0.541293	0.544569	0.545968	0.553345	0.542381	0.602375
Q14
Q14_M1	0.546655	0.582125	0.54587	0.55292	0.53411	0.53946	0.543815	0.52517	0.57595	0.55232	0.583305	0.564925	0.5513	0.581595	0.564555	0.554065	0.548375	0.55203	0.57593	0.534435
Q14_M2	0.6108	0.61011	0.614945	0.57964	0.56219	0.589865	0.59835	0.61287	0.60303	0.610295	0.6052	0.61236	0.61192	0.61955	0.596485	0.560375	0.585415	0.59753	0.62161	0.59039
Q14_S1	0.605795	0.63088	0.603365	0.610935	0.623345	0.622085	0.63773	0.63007	0.637895	0.608945	0.628505	0.625685	0.626355	0.601875	0.6058	0.64542	0.64054	0.614845	0.64219	0.645155
Q14_S2	0.6367	0.619575	0.641625	0.65378	0.63531	0.625335	0.65521	0.63726	0.63123	0.6407	0.62351	0.64234	0.665295	0.6531	0.63161	0.6321	0.64887	0.62772	0.639495	0.63027
Q14_L1	0.59922	0.58643	0.574003	0.583435	0.573825	0.593846	0.579441	0.606242	0.606515	0.615782	0.60745	0.5901	0.597598	0.602922	0.573869	0.600556	0.589674	0.600117	0.585076	0.597153
Q14_L2	0.569449	0.545618	0.567814	0.575567	0.595175	0.577908	0.591118	0.563655	0.566892	0.586933	0.556118	0.608347	0.602069	0.573717	0.59936	0.607673	0.633119	0.586723	0.57441	0.586354
Q15
Q15_M1	0.519185	0.51001	0.509485	0.546055	0.51995	0.500975	0.53215	0.53333	0.5252	0.530155	0.534985	0.52145	0.536045	0.52142	0.532025	0.502935	0.51538	0.63707	0.531375	0.523665
Q15_M2	0.55836	0.556935	0.58902	0.668095	0.5708	0.547005	0.58143	0.546415	0.59414	0.591415	0.57618	0.5727	0.58595	0.56504	0.553055	0.585515	0.66317	0.56622	0.59706	0.55584
Q15_L1	0.52093	0.536625	0.54318	0.54703	0.53432	0.524385	0.537235	0.51534	0.53314	0.54295	0.544005	0.549145	0.52698	0.531875	0.55556	0.52416	0.563375	0.53151	0.539765	0.531695
Q15_L2	0.56047	0.57336	0.59077	0.58234	0.55537	0.586805	0.57595	0.555965	0.600375	0.55503	0.55704	0.53888	0.551615	0.590235	0.56205	0.586965	0.539445	0.552695	0.551345	0.56775
Q19
Q19_M1	0.58718	0.56994	0.59072	0.573185	0.587195	0.59284	0.585795	0.597355	0.587145	0.58615	0.5923	0.62131	0.583595	0.58302	0.596705	0.487815	0.61088	0.593195	0.59233	0.60932
Q19_M2	0.59757	0.611985	0.61849	0.58965	0.58798	0.58981	0.60358	0.58859	0.60951	0.59002	0.58235	0.5847	0.5884	0.588035	0.603295	0.607145	0.58894	0.590305	0.574265	0.59721
Q19_S1	0.62856	0.64849	0.635645	0.644675	0.65958	0.682255	0.63049	0.65541	0.668105	0.667445	0.63234	0.630265	0.667705	0.650025	0.674085	0.659795	0.66243	0.694725	0.63856	0.66476
Q19_S2	0.63127	0.66128	0.640565	0.62975	0.658955	0.630275	0.66277	0.653635	0.633895	0.65483	0.65525	0.64554	0.641465	0.62669	0.655235	0.639555	0.662505	0.650915	0.65224	0.647695
Q19_L1	0.564673	0.597299	0.584102	0.590354	0.56024	0.569729	0.571554	0.613339	0.590119	0.577437	0.599099	0.577978	0.592459	0.586901	0.553772	0.600155	0.610414	0.601707	0.572661	0.602057
Q19_L2	0.548378	0.566072	0.540295	0.546095	0.567051	0.557918	0.554885	0.584586	0.586437	0.550922	0.584796	0.578741	0.585215	0.576261	0.525559	0.582455	0.56943	0.593121	0.58886	0.553981
Q33
Q33_M1	0.53184	0.50334	0.52561	0.53185	0.486395	0.498495	0.51682	0.523585	0.51459	0.499575	0.505765	0.50823	0.49605	0.50021	0.523135	0.51962	0.500485	0.47386	0.51045	0.52156
Q33_M2	0.530685	0.561805	0.577125	0.564055	0.585945	0.55953	0.55301	0.56072	0.54161	0.57573	0.525465	0.559195	0.563765	0.56763	0.55327	0.553495	0.576915	0.582725	0.5058	0.529325
Q33_L1	0.480795	0.50606	0.53886	0.48236	0.48089	0.49157	0.47252	0.44205	0.49064	0.473895	0.458295	0.499635	0.486715	0.481435	0.50889	0.590395	0.481375	0.4989	0.53735	0.471865
Q33_L2	0.511955	0.49389	0.515075	0.48201	0.534675	0.505315	0.52106	0.484115	0.500415	0.510605	0.51371	0.529075	0.46666	0.415755	0.50059	0.530595	0.531365	0.491875	0.515005	0.48429
Q33_S1	0.613257	0.591436	0.620615	0.645915	0.588624	0.572597	0.594609	0.609205	0.633437	0.611031	0.586233	0.621455	0.637819	0.572273	0.584548	0.604295	0.616577	0.610388	0.626734	0.632464
Q33_S2	0.605173	0.580369	0.631033	0.650386	0.570918	0.583721	0.616519	0.555209	0.595709	0.619674	0.59709	0.644287	0.606006	0.640121	0.612557	0.597579	0.578041	0.625964	0.595919	0.608429
Q36
Q36_M1	0.514655	0.54845	0.51625	0.507575	0.47491	0.51009	0.526025	0.50178	0.50748	0.5125	0.52263	0.546975	0.50036	0.45549	0.54912	0.51484	0.51329	0.53808	0.519215	0.554995
Q36_M2	0.54029	0.548985	0.56621	0.53132	0.556095	0.53129	0.553865	0.553085	0.569365	0.552755	0.55316	0.556365	0.541835	0.540465	0.544035	0.54579	0.55676	0.53828	0.53924	0.55296
Q36_L1	0.504085	0.544725	0.49012	0.508755	0.484345	0.494865	0.52716	0.514695	0.52958	0.489505	0.52031	0.5124	0.502855	0.523685	0.511195	0.52907	0.54066	0.47502	0.52042	0.54754
Q36_L2	0.508825	0.49256	0.476185	0.511325	0.51455	0.485105	0.476915	0.49599	0.470545	0.456845	0.49167	0.504385	0.49282	0.47483	0.49954	0.494505	0.515645	0.507945	0.49202	0.50373
Q36_S1	0.612481	0.631395	0.636693	0.628489	0.628603	0.628126	0.63537	0.640013	0.634734	0.627853	0.627618	0.64063	0.622848	0.616208	0.615107	0.614936	0.619184	0.613797	0.628317	0.6078
Q36_S2	0.622078	0.616507	0.635669	0.644007	0.652485	0.658705	0.618949	0.612277	0.633532	0.615998	0.633876	0.641031	0.629379	0.654241	0.648243	0.595099	0.617346	0.642354	0.639689	0.632286
