# Supplementary material for: The molecular basis of socially induced egg-size plasticity in honey bees
Source: eLife. 2022 Nov 8;11:e80499. doi: 10.7554/eLife.80499 (PMC9747152; doi:10.7554/eLife.80499)
Supplement: Figure 2—source data 1. [file elife-80499-fig2-data1.xlsx]

## Sheet: Sheet1
Test 1
Factor	Colony	1	2	3	4	5	Mean ± s.e.m
Wing size	Small	2.528	2.129	2.394	2.4825	2.344	2.375 ± 0.155 mm
	Large	2.357	2.4545	2.305	2.1455	2.3755	2.327 ± 0.115 mm
Body weight	Small	0.29	0.287	0.283	0.271	0.286	0.283 ± 0.007 mg
	Large	0.308	0.247	0.308	0.228	0.251	0.268 ± 0.037 mg
Ovary weight	Small	0.086	0.065	0.086	0.067	0.085	0.078 ± 0.010 mg
	Large	0.097	0.115	0.11	0.089	0.091	0.100 ± 0.011 mg
