# Supplementary material for: The molecular basis of socially induced egg-size plasticity in honey bees
Source: eLife. 2022 Nov 8;11:e80499. doi: 10.7554/eLife.80499 (PMC9747152; doi:10.7554/eLife.80499)
Supplement: Figure 2—source data 2. [file elife-80499-fig2-data2.xlsx]

## Sheet: Sheet1
Test 2
Factor	Colony	1	2	3	4	Mean ± s.e.m
Wing size	Small	2.3945	2.412	2.1355	2.221	2.291 ± 0.135 mm
	Large	2.151	2.308	2.325	2.2985	2.271 ± 0.081 mm
Body weight	Small	0.2416	0.2803	0.2521	0.2674	0.260 ± 0.017 mg
	Large	0.287	0.2356	0.2624	0.2855	0.268 ± 0.024 mg
Ovary weight	Small	0.0734	0.067	0.0724	0.0893	0.075 ± 0.010 mg
	Large	0.1005	0.1055	0.1	0.1118	0.105 ± 0.006 mg
