# Supplementary material for: The molecular basis of socially induced egg-size plasticity in honey bees
Source: eLife. 2022 Nov 8;11:e80499. doi: 10.7554/eLife.80499 (PMC9747152; doi:10.7554/eLife.80499)
Supplement: Figure 2—source data 3. [file elife-80499-fig2-data3.xlsx]

## Sheet: Sheet1
Test 3
Factor	Colony	1	2	3	4	5	6	Mean ± s.e.m
Wing size	Small	2.545	2.584	2.586	2.586	2.456	2.664	2.570 ± 0.068 mm
	Large	2.579	2.57	2.554	2.554	2.613	2.61	2.580 ± 0.026 mm
Body weight	Small	0.27	0.261	0.274	0.278	0.286	0.301	0.278 ± 0.014 mm
	Large	0.281	0.294	0.284	0.309	0.349	0.33	0.308 ± 0.027 mm
Ovary weight	Small	0.0631	0.0536	0.0648	0.0755	0.0714	0.0788	0.068 ± 0.009 mm
	Large	0.0817	0.094	0.0858	0.0992	0.119	0.1164	0.099 ± 0.015 mm
