# Supplementary material for: The molecular basis of socially induced egg-size plasticity in honey bees
Source: eLife. 2022 Nov 8;11:e80499. doi: 10.7554/eLife.80499 (PMC9747152; doi:10.7554/eLife.80499)
Supplement: Figure 3—source data 1. [file elife-80499-fig3-data1.xlsx]

## Sheet: Sheet1
Queen	1	2	3	4	5	6	7	8	9	10	11	12	13	14	15	16	17	18	19	20
Q1
Q1_L1	0.525987	0.52296	0.540709	0.545283	0.535197	0.534159	0.544557	0.522672	0.521906	0.511395	0.526273	0.527379	0.54057	0.547081	0.527467	0.526944	0.549384	0.520913	0.518938	0.517056
Q1_L2	0.52746	0.517238	0.52454	0.549053	0.516148	0.515398	0.527022	0.524612	0.536537	0.522201	0.555126	0.543441	0.529163	0.531097	0.533076	0.520323	0.537193	0.519194	0.533858	0.51802
Q2
Q2_L1	0.530772	0.516089	0.532965	0.532657	0.550169	0.510555	0.512397	0.545838	0.538558	0.555759	0.50587	0.570675	0.566082	0.504222	0.54589	0.522558	0.514088	0.534098	0.524187	0.550919
Q2_L2	0.523713	0.533793	0.53413	0.548946	0.557903	0.544365	0.536806	0.536213	0.540287	0.524673	0.534944	0.578724	0.538568	0.53351	0.551399	0.503765	0.534185	0.541926	0.565754	0.552742
Q3
Q3_L1	0.556112	0.516219	0.586056	0.522555	0.558737	0.53958	0.558198	0.55403	0.555538	0.536738	0.548184	0.557326	0.531181	0.553118	0.556012	0.551619	0.557277	0.551791	0.521527	0.563201
Q3_L2	0.546224	0.532424	0.528427	0.553627	0.538701	0.547713	0.567091	0.523382	0.53475	0.542377	0.560284	0.552859	0.550536	0.535778	0.556213	0.536505	0.554568	0.542539	0.55425	0.575263
Q4
Q4_L1	0.569845	0.557348	0.508809	0.556125	0.545718	0.551895	0.546925	0.552051	0.552609	0.53182	0.560739	0.497873	0.564012	0.560054	0.537102	0.526273	0.553056	0.498905	0.524138	0.563512
Q4_L2	0.519528	0.53557	0.54079	0.517883	0.526886	0.566471	0.555924	0.540826	0.557533	0.548554	0.566954	0.528417	0.548064	0.542759	0.5254	0.55837	0.553819	0.54942	0.5345	0.524531
Q5
Q5_L1	0.579483	0.521721	0.536164	0.545845	0.552534	0.528245	0.555464	0.537744	0.554753	0.52611	0.523823	0.560035	0.544401	0.545715	0.571529	0.527859	0.524725	0.561644	0.551006	0.561498
Q5_L2	0.559366	0.53763	0.554695	0.553744	0.549806	0.546328	0.580953	0.543051	0.562675	0.524316	0.534175	0.554396	0.549365	0.529695	0.54212	0.554889	0.538558	0.5425	0.550111	0.544865
Q6
Q6_L1	0.548213	0.553339	0.554331	0.531444	0.550328	0.556103	0.547658	0.556009	0.577641	0.529043	0.547927	0.548794	0.564589	0.536112	0.523921	0.551694	0.552823	0.535175	0.538941	0.527418
Q6_L2	0.547133	0.556404	0.529682	0.547275	0.550052	0.492008	0.559762	0.551081	0.549819	0.561073	0.529757	0.538659	0.562581	0.542746	0.545845	0.540054	0.543538	0.564447	0.559035	0.550234
Q7
Q7_L1	0.556631	0.527048	0.552709	0.523953	0.552187	0.519794	0.537893	0.518578	0.500274	0.562036	0.528563	0.533212	0.551068	0.555026	0.542886	0.546344	0.558273	0.501121	0.542669	0.545514
Q7_L2	0.524271	0.553001	0.522402	0.555052	0.5516	0.544161	0.555327	0.552709	0.53475	0.527298	0.520946	0.526805	0.534552	0.534065	0.514957	0.516333	0.528612	0.567334	0.524943	0.559321
Q8
Q8_L1	0.512054	0.52417	0.525909	0.524664	0.538292	0.530815	0.532073	0.534876	0.520563	0.541021	0.537656	0.540515	0.531201	0.569754	0.513037	0.508235	0.535055	0.514616	0.537212	0.545682
Q8_L2	0.537014	0.534406	0.545137	0.547976	0.545394	0.544686	0.513293	0.491547	0.522451	0.519551	0.546299	0.554938	0.542552	0.517964	0.52345	0.5346	0.544722	0.543356	0.547901	0.534662
