# Supplementary material for: The molecular basis of socially induced egg-size plasticity in honey bees
Source: eLife. 2022 Nov 8;11:e80499. doi: 10.7554/eLife.80499 (PMC9747152; doi:10.7554/eLife.80499)
Supplement: Figure 4—source data 1. [file elife-80499-fig4-data1.xlsx]

## Sheet: Sheet1
Queen	1	2	3	4	5	6	7	8	9	10	11	12	13	14	15	16	17	18	19	20
Q1
Q1_S1	0.710784	0.690443	0.681015	0.69275	0.695695	0.70645	0.65952	0.700464	0.669281	0.697505	0.707196	0.683286	0.702871	0.679595	0.690297	0.656581	0.670216	0.672321	0.680023	0.684821
Q1_S2	0.690125	0.68329	0.701282	0.681012	0.692007	0.701411	0.689249	0.675296	0.67259	0.689703	0.701992	0.680182	0.683225	0.705629	0.681771	0.701496	0.714777	0.705103	0.70739	0.719429
Q1_(S+M)1	0.658686	0.681512	0.656928	0.650838	0.632032	0.670637	0.678446	0.657463	0.671968	0.665421	0.681395	0.669281	0.658144	0.656412	0.644928	0.676373	0.665969	0.652194	0.651224	0.664821
Q1_(S+M)2	0.655792	0.6617	0.655091	0.679474	0.653547	0.660568	0.651344	0.652457	0.657732	0.676068	0.646358	0.628593	0.666384	0.670582	0.661187	0.660671	0.659345	0.668324	0.64885	0.658478
Q2
Q2_S1	0.737817	0.727504	0.771089	0.734979	0.734995	0.688565	0.725976	0.712334	0.722589	0.735248	0.680899	0.755203	0.688149	0.720617	0.70121	0.712626	0.7148	0.709713	0.747384	0.742521
Q2_S2	0.737347	0.722794	0.687549	0.7445	0.734203	0.732435	0.66678	0.760896	0.718868	0.781182	0.745405	0.747576	0.746761	0.710933	0.751618	0.750054	0.745259	0.723634	0.7011	0.75179
Q2_(S+M)1	0.68606	0.670174	0.647163	0.625845	0.660522	0.685132	0.682407	0.66861	0.662232	0.696072	0.695488	0.662864	0.649693	0.68705	0.667896	0.680415	0.682855	0.659001	0.663617	0.680376
Q2_(S+M)2	0.672581	0.665051	0.703192	0.684873	0.699669	0.654342	0.658472	0.674592	0.691436	0.672798	0.68947	0.688607	0.674777	0.683465	0.677236	0.6663	0.627198	0.689616	0.660697	0.705032
Q3
Q3_S1	0.67163	0.651312	0.691728	0.648905	0.669849	0.629002	0.681194	0.663494	0.663792	0.680503	0.675854	0.669239	0.65418	0.66182	0.700124	0.662835	0.688042	0.666761	0.702102	0.64012
Q3_S2	0.678047	0.636937	0.659212	0.631263	0.668104	0.644477	0.63282	0.65793	0.667264	0.691945	0.655591	0.669651	0.669677	0.659075	0.659997	0.677885	0.699027	0.647756	0.661538	0.699822
Q3_(S+M)1	0.622501	0.653161	0.576573	0.620639	0.634498	0.635821	0.668866	0.66037	0.639743	0.648159	0.613083	0.581731	0.607938	0.612061	0.628853	0.632574	0.688977	0.649998	0.636418	0.641181
Q3_(S+M)2	0.624661	0.656509	0.628201	0.596593	0.618556	0.654407	0.650186	0.641083	0.569874	0.642997	0.59366	0.569634	0.688604	0.609995	0.669869	0.610686	0.610017	0.641288	0.615467	0.649057
Q4
Q4_S1	0.673985	0.683481	0.687942	0.652843	0.644674	0.633625	0.665249	0.685366	0.665933	0.653213	0.654533	0.652898	0.666848	0.664328	0.677113	0.672441	0.67502	0.657223	0.654851	0.640866
Q4_S2	0.660399	0.645424	0.652389	0.668873	0.637813	0.649051	0.653962	0.665933	0.668976	0.64375	0.668441	0.648379	0.655095	0.676428	0.668451	0.671445	0.649881	0.667468	0.674965	0.682521
Q4_(S+M)1	0.649015	0.640357	0.674816	0.675877	0.681742	0.689048	0.635811	0.671328	0.688269	0.673476	0.641541	0.66847	0.64799	0.667977	0.664522	0.691095	0.677165	0.69527	0.694793	0.654712
Q4_(S+M)2	0.640668	0.668717	0.659594	0.638374	0.690164	0.680402	0.679783	0.697372	0.630368	0.652989	0.672947	0.660399	0.676324	0.663212	0.675442	0.681171	0.670073	0.670443	0.662079	0.683384
Q5
Q5_S1	0.640554	0.626053	0.620823	0.622504	0.637852	0.647283	0.599665	0.631594	0.646595	0.621602	0.650501	0.640882	0.631023	0.633641	0.630342	0.663643	0.613544	0.624311	0.631938	0.617956
Q5_S2	0.658702	0.638562	0.648743	0.615503	0.62895	0.653236	0.628538	0.628875	0.655529	0.641784	0.624236	0.62082	0.62276	0.651679	0.630932	0.612664	0.610348	0.612531	0.640772	0.634812
Q5_(S+M)1	0.655357	0.6309	0.6498	0.597329	0.652178	0.638799	0.631529	0.604694	0.660318	0.643448	0.655776	0.628723	0.647572	0.643594	0.633456	0.630345	0.642507	0.635052	0.649593	0.637738
Q5_(S+M)2	0.640905	0.672869	0.648308	0.632545	0.657661	0.604408	0.6412	0.692493	0.621716	0.611694	0.678946	0.671439	0.62907	0.657894	0.642618	0.681979	0.623273	0.609248	0.622922	0.62021
Q6
Q6_S1	0.717616	0.722745	0.717992	0.714978	0.723705	0.700996	0.711004	0.717486	0.714722	0.725989	0.72474	0.737532	0.668814	0.731939	0.700993	0.708396	0.69236	0.684344	0.715994	0.685191
Q6_S2	0.756614	0.742551	0.692302	0.718365	0.696746	0.726038	0.695338	0.710223	0.711374	0.691536	0.717509	0.708247	0.694547	0.68824	0.710871	0.742551	0.717321	0.710287	0.720665	0.716425
Q6_(S+M)1	0.7222	0.724286	0.722161	0.729827	0.707955	0.730194	0.723452	0.712007	0.712497	0.734122	0.727215	0.683442	0.723335	0.694861	0.703932	0.71613	0.722158	0.711368	0.717632	0.734476
Q6_(S+M)2	0.695371	0.734972	0.690715	0.753658	0.731932	0.737289	0.711643	0.712948	0.703098	0.744413	0.723167	0.734307	0.720425	0.704393	0.70851	0.732867	0.672253	0.73759	0.714021	0.728883
