# Supplementary material for: The molecular basis of socially induced egg-size plasticity in honey bees
Source: eLife. 2022 Nov 8;11:e80499. doi: 10.7554/eLife.80499 (PMC9747152; doi:10.7554/eLife.80499)
Supplement: Figure 8—source data 1. [file elife-80499-fig8-data1.xlsx]

## Sheet: Sheet1
Large colony								Small colony
Control				-Rho1				Control				-Rho1
	CylD	LOC409617	Rho1		CylD	LOC409617	Rho1		CylD	LOC409617	Rho1		CylD	LOC409617	Rho1
	19.98	19.31	20.43		21.67	19.79	22.21		20.82	19.93	20.09		19.95	18.74	19.74
Q1	19.83	19.22	20.64	Q4	21.09	20.23	22.59	Q7	21.03	19.82	20.14	Q10	19.99	19.02	19.34
	19.84	19.33	20.62		21.29	20.47	22.16		20.66	19.52	19.81		19.34	18.76	19.81
	19.86	18.92	20.39		20.65	19.73	21.65		19.96	19.13	19.84		20.32	19.25	19.99
Q2	19.88	19.19	20.64	Q5	20.67	20.08	22.33	Q8	20.57	19.76	19.61	Q11	19.93	19.8	20.38
	19.72	18.82	20.29		20.68	19.67	22.08		19.99	19.35	19.41		20.43	19.95	20.41
	20.02	19.17	20.45		20.71	19.48	21.47		21.51	20.6	20.41		20.44	19.66	20.54
Q3	19.88	19.62	20.47	Q6	20.53	19.62	21.48	Q9	21.63	19.91	20.73	Q12	20.17	19.68	20.57
	19.96	19.25	20.64		20.8	19.46	21.97		21.71	19.94	20.54		20.79	19.89	20.21
