# Supplementary material for: The molecular basis of socially induced egg-size plasticity in honey bees
Source: eLife. 2022 Nov 8;11:e80499. doi: 10.7554/eLife.80499 (PMC9747152; doi:10.7554/eLife.80499)
Supplement: Figure 8—source data 2. [file elife-80499-fig8-data2.xlsx]

## Sheet: Sheet1
Queen	1	2	3	4	5	6	7	8	9	10	11	12	13	14	15	16	17	18	19	20
Q1
Q1_M	0.585949	0.563545	0.523541	0.556485	0.528145	0.568512	0.553569	0.569511	0.599256	0.603672	0.570325	0.578059	0.582218	0.559516	0.571405	0.574494	0.566948	0.581209	0.558656	0.517101
Q1_L1	0.540735	0.523038	0.539291	0.555136	0.531554	0.519207	0.556275	0.514866	0.55135	0.541374	0.531434	0.537199	0.50974	0.548472	0.529481	0.545572	0.530062	0.522925	0.549588	0.547707
Q1_L2	0.54785	0.523703	0.526996	0.526568	0.530347	0.526448	0.536038	0.54057	0.533942	0.531648	0.53558	0.532868	0.549186	0.51072	0.542043	0.508193	0.556949	0.540787	0.556875	0.524407
Q2
Q2_M	0.597498	0.62351	0.576414	0.572541	0.615513	0.59889	0.550584	0.597816	0.595419	0.594189	0.595256	0.633615	0.572826	0.615662	0.598828	0.603834	0.619085	0.60785	0.599029	0.577611
Q2_L1	0.518393	0.545209	0.538234	0.542652	0.530561	0.521202	0.546614	0.519385	0.543262	0.521708	0.536394	0.533566	0.529076	0.539373	0.544271	0.515421	0.542493	0.544618	0.522059	0.541034
Q2_L2	0.540398	0.532557	0.512109	0.526402	0.532281	0.54298	0.544703	0.545339	0.526571	0.533371	0.512381	0.522247	0.537997	0.507074	0.529231	0.528063	0.512144	0.511784	0.537338	0.521017
Q3
Q3_M	0.577835	0.561835	0.581196	0.601385	0.60387	0.616029	0.576145	0.591558	0.560074	0.547123	0.569186	0.566951	0.588421	0.60772	0.608989	0.593719	0.572184	0.550419	0.568602	0.585303
Q3_L1	0.56706	0.544446	0.518204	0.551298	0.520544	0.554026	0.524745	0.527499	0.545838	0.54238	0.529711	0.565118	0.567967	0.533582	0.497033	0.540612	0.571671	0.535347	0.474431	0.51643
Q3_L2	0.533277	0.527587	0.52237	0.546672	0.54443	0.551318	0.545897	0.584262	0.539194	0.545549	0.562552	0.538159	0.557874	0.53692	0.544781	0.546484	0.544975	0.550069	0.504112	0.548073
Q4
Q4_M	0.561131	0.592706	0.574432	0.582591	0.607196	0.589861	0.571749	0.587188	0.580207	0.57025	0.580544	0.595412	0.606599	0.57305	0.561199	0.570328	0.579503	0.586182	0.586105	0.588463
Q4_L1	0.574766	0.555022	0.527155	0.532125	0.543214	0.557997	0.556612	0.547522	0.522724	0.527622	0.50856	0.489296	0.519801	0.546918	0.536651	0.549721	0.535223	0.552966	0.532888	0.573079
Q4_L2	0.500436	0.479888	0.505225	0.505903	0.503664	0.507888	0.480731	0.512884	0.501912	0.475713	0.516096	0.491142	0.507152	0.485192	0.506418	0.482272	0.501945	0.483038	0.472793	0.484095
Q5
Q5_M	0.597842	0.6109	0.605164	0.588836	0.603535	0.60593	0.596758	0.606789	0.604259	0.565929	0.571774	0.580791	0.636447	0.583863	0.594364	0.619886	0.610887	0.586137	0.580671	0.598569
Q5_L1	0.54518	0.46891	0.521913	0.530467	0.520832	0.484929	0.527746	0.493886	0.53572	0.498714	0.504874	0.517825	0.561391	0.502152	0.547431	0.521977	0.485101	0.531648	0.539639	0.549559
Q5_L2	0.476647	0.480134	0.489844	0.485465	0.447834	0.501533	0.476906	0.497189	0.466616	0.471135	0.477426	0.461302	0.438301	0.505144	0.470065	0.472829	0.464293	0.485001	0.471547	0.481838
Q6
Q6_M	0.558348	0.563104	0.561838	0.577329	0.578419	0.525624	0.564687	0.582568	0.561128	0.57098	0.552573	0.579441	0.551603	0.584518	0.583357	0.561689	0.574049	0.583814	0.577018	0.589118
Q6_L1	0.521231	0.533702	0.534221	0.561138	0.540952	0.535022	0.529867	0.494152	0.539908	0.533669	0.485273	0.522681	0.54335	0.523755	0.53839	0.544417	0.511564	0.535506	0.523616	0.53242
Q6_L2	0.499684	0.487521	0.503817	0.503612	0.502551	0.516453	0.488563	0.521692	0.479924	0.505562	0.462048	0.539982	0.506127	0.509341	0.481945	0.491748	0.467988	0.489276	0.476653	0.528842
Q7
Q7_M	0.562396	0.585284	0.547184	0.571071	0.577887	0.557712	0.569988	0.55353	0.544771	0.557342	0.558351	0.579558	0.582004	0.548132	0.550857	0.563655	0.551077	0.599519	0.548956	0.580521
Q7_S1	0.664026	0.663328	0.686284	0.683656	0.642164	0.647237	0.649391	0.661323	0.638854	0.662874	0.684737	0.692266	0.668808	0.681502	0.677337	0.658349	0.630326	0.642621	0.645911	0.676373
Q7_S2	0.668032	0.670573	0.662563	0.681681	0.666076	0.654232	0.634452	0.652736	0.654845	0.690712	0.660662	0.676055	0.645975	0.670199	0.665697	0.631208	0.639932	0.623571	0.652201	0.667247
Q8
Q8_M	0.605826	0.588483	0.558812	0.576366	0.600379	0.582273	0.618536	0.583136	0.579412	0.553796	0.566328	0.554127	0.547181	0.592716	0.610864	0.569452	0.620308	0.595603	0.604149	0.591779
Q8_S1	0.605926	0.659812	0.609148	0.642485	0.622218	0.664075	0.651357	0.684912	0.689583	0.650751	0.621712	0.612223	0.662144	0.618689	0.641959	0.589676	0.600538	0.631938	0.672659	0.666722
Q8_S2	0.620347	0.684788	0.653933	0.61925	0.639215	0.657262	0.602384	0.636791	0.627451	0.628639	0.644872	0.635205	0.659779	0.64072	0.692325	0.632415	0.624927	0.608145	0.590857	0.647267
Q9
Q9_M	0.583642	0.609096	0.599844	0.624499	0.605884	0.619763	0.587123	0.586974	0.602916	0.627007	0.575418	0.595834	0.626248	0.625378	0.600333	0.606786	0.588382	0.579947	0.632811	0.556362
Q9_S1	0.637388	0.669135	0.654462	0.628493	0.634491	0.646683	0.645615	0.635526	0.630063	0.657246	0.629437	0.668717	0.643656	0.629949	0.643656	0.675166	0.669223	0.639828	0.718777	0.660279
Q9_S2	0.68778	0.662498	0.636966	0.653599	0.638352	0.674199	0.654774	0.621514	0.667676	0.634183	0.689801	0.666394	0.634851	0.653125	0.661583	0.676276	0.632233	0.635111	0.633755	0.633748
Q10
Q10_M	0.561303	0.510175	0.591201	0.583581	0.578114	0.589923	0.558169	0.567246	0.573394	0.571976	0.535243	0.56601	0.578182	0.583096	0.542581	0.583246	0.551259	0.565939	0.551934	0.530279
Q10_S1	0.680526	0.676013	0.673275	0.644937	0.63355	0.66011	0.654585	0.672075	0.675916	0.663439	0.669213	0.671796	0.672175	0.657823	0.678644	0.664438	0.663559	0.645515	0.673489	0.648885
Q10_S2	0.603857	0.58783	0.607412	0.600885	0.612885	0.622102	0.59695	0.586085	0.622812	0.60044	0.576567	0.635983	0.596726	0.595172	0.582578	0.623581	0.616778	0.604204	0.603941	0.612308
Q11
Q11_M	0.562795	0.566883	0.568164	0.554292	0.559649	0.545588	0.554108	0.573501	0.571026	0.577589	0.575976	0.561001	0.572599	0.569576	0.570117	0.543814	0.560839	0.566821	0.563026	0.564378
Q11_S1	0.672425	0.663315	0.687225	0.677813	0.685788	0.699011	0.659163	0.670657	0.690449	0.685418	0.633106	0.678514	0.690732	0.678816	0.684678	0.687669	0.685093	0.694297	0.714271	0.718352
Q11_S2	0.580963	0.625703	0.640058	0.636953	0.581819	0.60046	0.612587	0.640689	0.62301	0.631669	0.614793	0.569577	0.587367	0.595003	0.593216	0.582533	0.625103	0.587032	0.598796	0.590264
Q12
Q12_M	0.607295	0.598303	0.559885	0.56857	0.586607	0.566318	0.568959	0.590997	0.562568	0.60202	0.576431	0.564135	0.592895	0.584551	0.596132	0.567191	0.56796	0.559295	0.581332	0.580349
Q12_S1	0.65576	0.651799	0.664645	0.646436	0.63815	0.654553	0.625813	0.659458	0.636561	0.61562	0.615805	0.623591	0.642086	0.665051	0.641255	0.628275	0.631876	0.655516	0.617803	0.653518
Q12_S2	0.602637	0.591422	0.588281	0.589433	0.634368	0.621398	0.59354	0.567545	0.586776	0.615993	0.621923	0.6161	0.605761	0.61768	0.632204	0.59329	0.590092	0.590929	0.632678	0.594303
