# Supplementary material for: The molecular basis of socially induced egg-size plasticity in honey bees
Source: eLife. 2022 Nov 8;11:e80499. doi: 10.7554/eLife.80499 (PMC9747152; doi:10.7554/eLife.80499)
Supplement: Supplementary file 1. [file elife-80499-supp1.xlsx]

## Sheet: Sheet1
Egg size of the eight queens used in Test 1.
Queen	1	2	3	4	5	6	7	8	9	10	11	12	13	14	15	16	17	18	19	20
L_Q1	0.546349	0.577189	0.554745	0.518016	0.556793	0.542514	0.541592	0.588205	0.578213	0.574531	0.555457	0.566625	0.544372	0.562135	0.53604	0.587066	0.550852	0.550706	0.541007	0.532154
L_Q5	0.537458	0.561594	0.558427	0.547959	0.56314	0.548257	0.570581	0.581018	0.576871	0.542203	0.563604	0.566002	0.534717	0.568686	0.557976	0.559909	0.560195	0.651296	0.56728	0.553485
L_Q12	0.532637	0.537821	0.57324	0.553307	0.505194	0.519568	0.545554	0.4806	0.48745	0.550782	0.510225	0.563013	0.538527	0.527988	0.541293	0.544569	0.545968	0.553345	0.542381	0.602375
L_Q14	0.569449	0.545618	0.567814	0.575567	0.595175	0.577908	0.591118	0.563655	0.566892	0.586933	0.556118	0.608347	0.602069	0.573717	0.59936	0.607673	0.633119	0.586723	0.57441	0.586354
L_Q19	0.548378	0.566072	0.540295	0.546095	0.567051	0.557918	0.554885	0.584586	0.586437	0.550922	0.584796	0.578741	0.585215	0.576261	0.525559	0.582455	0.56943	0.593121	0.58886	0.553981
S_Q3	0.645152	0.634601	0.612983	0.631421	0.650234	0.64804	0.624768	0.617734	0.6107	0.635847	0.623649	0.644306	0.636032	0.621436	0.630855	0.62141	0.626823	0.641317	0.60123	0.587613
S_Q33	0.605173	0.580369	0.631033	0.650386	0.570918	0.583721	0.616519	0.555209	0.595709	0.619674	0.59709	0.644287	0.606006	0.640121	0.612557	0.597579	0.578041	0.625964	0.595919	0.608429
S_Q36	0.622078	0.616507	0.635669	0.644007	0.652485	0.658705	0.618949	0.612277	0.633532	0.615998	0.633876	0.641031	0.629379	0.654241	0.648243	0.595099	0.617346	0.642354	0.639689	0.632286
Egg size of the two additional queens in the small colonies.
Queen	1	2	3	4	5	6	7	8	9	10	11	12	13	14	15	16	17	18	19	20
S_Q#1	0.66363	0.67169	0.66153	0.64385	0.63955	0.63897	0.65141	0.65195	0.63543	0.67098	0.64111	0.66427	0.64674	0.64583	0.64389	0.67744	0.65903	0.6387	0.65008	0.63401
S_Q#11	0.64022	0.63795	0.64321	0.60808	0.63069	0.6774	0.61645	0.6413	0.6427	0.65293	0.63727	0.64929	0.62507	0.6212	0.63795	0.653	0.6096	0.62004	0.64158	0.67552
Egg size of the eight queens used in Test 2.
Queen	1	2	3	4	5	6	7	8	9	10
L_Q1	0.48367	0.43777	0.44357	0.38492	0.44173	0.43105	0.42761	0.44032	0.43056	0.44807
L_Q2	0.58072	0.57381	0.55597	0.56655	0.5544	0.55818	0.5621	0.55373	0.55917	0.59117
L_Q3	0.48345	0.50395	0.50038	0.50413	0.51472	0.5409	0.50968	0.51148	0.56091	0.52857
L_Q4	0.59169	0.58824	0.57511	0.57431	0.56092	0.5537	0.59034	0.5654	0.61735	0.57691
S_Q1	0.60845	0.6543	0.64298	0.66749	0.68628	0.64281	0.55379	0.64248	0.62795	0.59341
S_Q2	0.64937	0.65146	0.62998	0.61979	0.64316	0.60016	0.61093	0.5926	0.61195	0.61402
S_Q3	0.64482	0.64683	0.6074	0.63902	0.62576	0.65001	0.60607	0.63972	0.6634	0.64797
S_Q4	0.59042	0.62828	0.73431	0.5859	0.62257	0.58149	0.62801	0.61262	0.62499	0.60288
Egg size of the 12 queens used in Test 3.
Queen	1	2	3	4	5	6	7	8	9	10	11	12	13	14	15	16	17	18	19	20
L_Q1	0.54785	0.523703	0.526996	0.526568	0.530347	0.526448	0.536038	0.54057	0.533942	0.531648	0.53558	0.532868	0.549186	0.51072	0.542043	0.508193	0.556949	0.540787	0.556875	0.524407
L_Q2	0.540398	0.532557	0.512109	0.526402	0.532281	0.54298	0.544703	0.545339	0.526571	0.533371	0.512381	0.522247	0.537997	0.507074	0.529231	0.528063	0.512144	0.511784	0.537338	0.521017
L_Q3	0.533277	0.527587	0.52237	0.546672	0.54443	0.551318	0.545897	0.584262	0.539194	0.545549	0.562552	0.538159	0.557874	0.53692	0.544781	0.546484	0.544975	0.550069	0.504112	0.548073
L_Q4	0.500436	0.479888	0.505225	0.505903	0.503664	0.507888	0.480731	0.512884	0.501912	0.475713	0.516096	0.491142	0.507152	0.485192	0.506418	0.482272	0.501945	0.483038	0.472793	0.484095
L_Q5	0.476647	0.480134	0.489844	0.485465	0.447834	0.501533	0.476906	0.497189	0.466616	0.471135	0.477426	0.461302	0.438301	0.505144	0.470065	0.472829	0.464293	0.485001	0.471547	0.481838
L_Q6	0.499684	0.487521	0.503817	0.503612	0.502551	0.516453	0.488563	0.521692	0.479924	0.505562	0.462048	0.539982	0.506127	0.509341	0.481945	0.491748	0.467988	0.489276	0.476653	0.528842
S_Q7	0.668032	0.670573	0.662563	0.681681	0.666076	0.654232	0.634452	0.652736	0.654845	0.690712	0.660662	0.676055	0.645975	0.670199	0.665697	0.631208	0.639932	0.623571	0.652201	0.667247
S_Q8	0.620347	0.684788	0.653933	0.61925	0.639215	0.657262	0.602384	0.636791	0.627451	0.628639	0.644872	0.635205	0.659779	0.64072	0.692325	0.632415	0.624927	0.608145	0.590857	0.647267
S_Q9	0.68778	0.662498	0.636966	0.653599	0.638352	0.674199	0.654774	0.621514	0.667676	0.634183	0.689801	0.666394	0.634851	0.653125	0.661583	0.676276	0.632233	0.635111	0.633755	0.633748
S_Q10	0.603857	0.58783	0.607412	0.600885	0.612885	0.622102	0.59695	0.586085	0.622812	0.60044	0.576567	0.635983	0.596726	0.595172	0.582578	0.623581	0.616778	0.604204	0.603941	0.612308
S_Q11	0.580963	0.625703	0.640058	0.636953	0.581819	0.60046	0.612587	0.640689	0.62301	0.631669	0.614793	0.569577	0.587367	0.595003	0.593216	0.582533	0.625103	0.587032	0.598796	0.590264
S_Q12	0.602637	0.591422	0.588281	0.589433	0.634368	0.621398	0.59354	0.567545	0.586776	0.615993	0.621923	0.6161	0.605761	0.61768	0.632204	0.59329	0.590092	0.590929	0.632678	0.594303
