# Supplementary material for: The molecular basis of socially induced egg-size plasticity in honey bees
Source: eLife. 2022 Nov 8;11:e80499. doi: 10.7554/eLife.80499 (PMC9747152; doi:10.7554/eLife.80499)
Supplement: Supplementary file 2. [file elife-80499-supp2.xlsx]

## Sheet: Sheet1
Accession	Description	Significance	Coverage (%)	#Peptides	#Unique	PTM	OV-L1 Intensity	OV-L2 Intensity	OV-L3 Intensity	OV-S1 Intensity	OV-S2 Intensity	OV-S3 Intensity	L Intensity	S Intensity	Group Profile (Ratio)	Avg. Mass
XP_624339.2	26S proteasome non-ATPase regulatory subunit 10 [Apis mellifera]	20.72	9	1	1	Carbamidomethylation	3900000	2280000	6600000	12000000	13200000	17100000	4260000	14100000	0.302128	24778
NP_001011572.1	transferrin 1 precursor [Apis mellifera]	23.88	49	27	27	Carbamidomethylation	500000000	567000000	554000000	1820000000	1920000000	1830000000	159000000	523000000	0.304015	78657
XP_016770146.1	protein kinase C isoform X2 [Apis mellifera]	22.05	2	1	1		5130000	2420000	1990000	8840000	10400000	11200000	3180000	10100000	0.314851	60633
XP_006560077.1	omega-conotoxin-like protein 1 [Apis mellifera]	35.5	31	1	1	Carbamidomethylation	13800000	19200000	19400000	47400000	54200000	53000000	17500000	51500000	0.339806	8298
XP_624132.1	MICOS complex subunit MIC25 isoform X1 [Apis mellifera]	22.99	28	2	2	Carbamidomethylation	13400000	14500000	9320000	31700000	31700000	32600000	12400000	32000000	0.3875	21642
XP_026296062.1	lysosomal alpha-mannosidase isoform X1 [Apis mellifera]	26.79	2	1	1		2550000	1550000	1780000	4600000	4680000	5490000	1960000	4920000	0.398374	116259
XP_001121113.1	mitochondrial import inner membrane translocase subunit Tim9 [Apis mellifera]	21.93	17	1	1	Carbamidomethylation	9090000	7940000	8130000	21100000	18100000	17500000	8390000	18900000	0.443915	10847
XP_006567280.1	protein croquemort [Apis mellifera]	21.26	3	1	1		9040000	7460000	11300000	20600000	20800000	21300000	9290000	20900000	0.444498	56214
XP_026300585.1	LOW QUALITY PROTEIN: uncharacterized protein LOC412936 [Apis mellifera]	29.9	7	8	2		2180000	3090000	2850000	6380000	5770000	5920000	2710000	6020000	0.450166	175664
XP_006561152.1	neuromodulin isoform X1 [Apis mellifera]	36.06	6	1	1		18900000	22400000	18300000	42700000	44300000	45500000	19900000	44200000	0.450226	23848
XP_026301410.1	fibrillin-2 [Apis mellifera]	22.77	5	8	8	Carbamidomethylation	171000000	177000000	187000000	379000000	357000000	407000000	105000000	231000000	0.454545	284116
XP_006567395.1	odorant binding protein 3 isoform X1 [Apis mellifera]	51.82	19	2	2	Carbamidomethylation	71900000	70400000	69500000	156000000	158000000	153000000	70600000	155000000	0.455484	17663
XP_006564597.1	putative acyl-CoA-binding protein [Apis mellifera]	50.22	47	5	5		170000000	177000000	167000000	339000000	340000000	342000000	104000000	221000000	0.470588	10025
NP_001011630.1	fatty acid binding protein [Apis mellifera]	40.72	40	6	6	Carbamidomethylation	166000000	216000000	178000000	323000000	340000000	336000000	89200000	185000000	0.482162	15035
XP_396922.2	spermine oxidase [Apis mellifera]	28.84	3	1	1		5460000	6240000	5550000	11100000	11800000	12700000	5750000	11900000	0.483193	57180
XP_026298263.1	superoxide dismutase [Cu-Zn] chloroplastic-like [Apis mellifera]	38.23	36	5	5		117000000	128000000	125000000	225000000	239000000	235000000	107000000	218000000	0.490826	18920
XP_026300889.1	protein canopy homolog 3 [Apis mellifera]	26.61	21	3	3	Carbamidomethylation	62700000	76300000	54800000	129000000	138000000	127000000	64600000	131000000	0.49313	26579
XP_006563164.1	pterin-4-alpha-carbinolamine dehydratase [Apis mellifera]	20.38	44	6	6		160000000	212000000	161000000	349000000	373000000	360000000	159000000	322000000	0.493789	16882
XP_003251619.1	histone H3 [Apis mellifera]	22.84	29	2	1	Carbamidomethylation	24900000	28600000	26400000	52200000	49500000	58900000	26600000	53600000	0.496269	15388
XP_026300651.1	deoxyuridine 5'-triphosphate nucleotidohydrolase isoform X3 [Apis mellifera]	25.99	62	7	4	Carbamidomethylation	170000000	183000000	185000000	326000000	371000000	366000000	173000000	346000000	0.5	15753
XP_006560961.1	40S ribosomal protein S21 [Apis mellifera]	28.84	33	2	2	Carbamidomethylation	57800000	74500000	73300000	143000000	135000000	134000000	68600000	137000000	0.50073	9210
XP_006562719.1	prosaposin isoform X1 [Apis mellifera]	32.08	15	10	10	Carbamidomethylation	408000000	481000000	449000000	825000000	922000000	947000000	371000000	738000000	0.50271	100100
XP_026297173.1	FK506-binding protein 2 isoform X2 [Apis mellifera]	40.09	49	12	12	Carbamidomethylation	416000000	441000000	467000000	887000000	958000000	927000000	273000000	533000000	0.512195	25558
XP_393544.3	myosin light chain alkali isoform X2 [Apis mellifera]	20.61	9	1	1		38400000	36100000	45000000	68400000	87000000	77400000	39800000	77600000	0.512887	16980
XP_006561695.2	dentin sialophosphoprotein isoform X5 [Apis mellifera]	22.22	22	9	9	Carbamidomethylation	226000000	239000000	224000000	386000000	401000000	428000000	117000000	226000000	0.517699	72294
XP_624310.2	NPC intracellular cholesterol transporter 2 homolog a [Apis mellifera]	26.42	28	4	4	Carbamidomethylation	229000000	233000000	228000000	399000000	415000000	393000000	163000000	306000000	0.53268	16971
XP_624357.1	calumenin [Apis mellifera]	40.55	51	12	12		360000000	398000000	341000000	574000000	610000000	641000000	90400000	166000000	0.544578	37772
XP_624806.3	peroxiredoxin-5 mitochondrial [Apis mellifera]	32.82	19	2	2	Carbamidomethylation	27000000	28300000	28300000	51100000	53100000	49400000	27900000	51200000	0.544922	20170
XP_623093.2	UV excision repair protein RAD23 homolog B isoform X2 [Apis mellifera]	28.72	32	7	7	Carbamidomethylation	293000000	330000000	360000000	578000000	586000000	604000000	278000000	510000000	0.545098	39623
XP_001120012.2	protein dpy-30 homolog [Apis mellifera]	39.24	32	2	2		17500000	18400000	16100000	32700000	31600000	30800000	17400000	31700000	0.548896	12140
XP_003249300.1	14 kDa phosphohistidine phosphatase [Apis mellifera]	48.73	40	4	4		157000000	169000000	158000000	295000000	278000000	286000000	116000000	210000000	0.552381	17213
XP_006568110.1	probable methylmalonate-semialdehyde dehydrogenase [acylating] mitochondrial isoform X2 [Apis mellifera]	35.6	7	2	2	Carbamidomethylation	15900000	15900000	13700000	28700000	26600000	26800000	15200000	27400000	0.554745	53097
XP_006561629.1	eukaryotic translation initiation factor eIF1 [Apis mellifera]	23.68	59	5	5	Carbamidomethylation	149000000	147000000	153000000	236000000	269000000	255000000	114000000	204000000	0.558824	12388
XP_006561337.1	tubulin-specific chaperone A isoform X2 [Apis mellifera]	49.16	25	2	2		85000000	89600000	85800000	153000000	152000000	157000000	86800000	154000000	0.563636	13954
XP_625060.1	ATP synthase subunit delta mitochondrial [Apis mellifera]	37.68	77	6	6		237000000	270000000	224000000	443000000	394000000	445000000	131000000	232000000	0.564655	17618
XP_006572119.2	histone deacetylase complex subunit SAP18 [Apis mellifera]	34.2	14	2	2	Carbamidomethylation	22500000	20000000	23400000	37800000	41100000	37700000	22000000	38900000	0.565553	17397
XP_001120530.1	COP9 signalosome complex subunit 9 [Apis mellifera]	25.87	34	1	1		5980000	5770000	5930000	10900000	10300000	9950000	5890000	10400000	0.566346	6457
XP_016773517.2	protein seele partial [Apis mellifera]	28.97	17	3	3	Carbamidomethylation	45600000	47300000	49200000	108000000	98700000	109000000	43100000	75500000	0.570861	21365
NP_001172074.1	actin related protein 1 [Apis mellifera]	20.84	55	14	2	Carbamidomethylation	33700000	42400000	33600000	62900000	64200000	65300000	36600000	64100000	0.570983	41806
XP_006566478.1	SUMO-conjugating enzyme UBC9-B [Apis mellifera]	24.84	28	3	3	Carbamidomethylation	123000000	122000000	132000000	215000000	201000000	198000000	94900000	166000000	0.571687	18203
XP_394359.2	charged multivesicular body protein 6 [Apis mellifera]	29.73	4	1	1		1010000	971000	1020000	1790000	1750000	1660000	999000	1740000	0.574138	24454
XP_026297818.1	vacuolar protein sorting-associated protein 13D [Apis mellifera]	21.68	0	1	1		3360000	4530000	4700000	8100000	6780000	6900000	4190000	7260000	0.577135	451369
XP_001122504.1	PEST proteolytic signal-containing nuclear protein [Apis mellifera]	55.53	8	1	1		23200000	24100000	23100000	39900000	40300000	40900000	23400000	40400000	0.579208	17786
XP_392722.1	26S proteasome regulatory subunit 6A-B [Apis mellifera]	26.94	57	19	18		506000000	498000000	484000000	757000000	762000000	756000000	142000000	245000000	0.579592	47628
XP_625293.2	myoneurin isoform X2 [Apis mellifera]	24.18	22	4	4		197000000	233000000	243000000	324000000	341000000	380000000	178000000	303000000	0.587459	26983
XP_001122256.1	protein FAM136A [Apis mellifera]	24.1	10	1	1	Carbamidomethylation	19200000	25600000	23300000	35300000	41700000	38300000	22700000	38400000	0.591146	16734
XP_623625.2	annexin B9 isoform X1 [Apis mellifera]	22.56	64	20	1	Carbamidomethylation	53700000	52400000	52500000	84300000	94400000	89500000	52900000	89400000	0.591723	35947
XP_395304.3	putative deoxyribonuclease TATDN1 isoform X1 [Apis mellifera]	28.97	19	4	4	Carbamidomethylation	27100000	26800000	29800000	44300000	47900000	50400000	26400000	44500000	0.593258	35241
XP_006557872.1	myosin-2 essential light chain isoform X4 [Apis mellifera]	33.42	47	4	4		316000000	349000000	313000000	532000000	548000000	555000000	282000000	472000000	0.597458	16123
XP_006559044.1	prefoldin subunit 4 [Apis mellifera]	37.7	53	5	5	Carbamidomethylation	82000000	85300000	88400000	143000000	154000000	148000000	68100000	113000000	0.602655	16072
XP_006565317.1	calmodulin [Apis mellifera]	31.21	40	7	7		758000000	738000000	815000000	1250000000	1280000000	1290000000	677000000	1120000000	0.604464	16811
XP_623372.1	myosin regulatory light chain sqh [Apis mellifera]	33.26	17	2	2	Carbamidomethylation	19600000	22100000	22400000	34900000	34600000	36300000	21400000	35300000	0.606232	19993
XP_001119891.2	multifunctional methyltransferase subunit TRM112-like protein [Apis mellifera]	21.34	40	4	4		85400000	67200000	80800000	143000000	149000000	137000000	55700000	91800000	0.606754	13925
XP_003250941.2	probable serine/threonine-protein kinase samkC [Apis mellifera]	28.79	52	10	10	Carbamidomethylation; Oxidation (M)	4840000000	5110000000	5780000000	8360000000	9530000000	9130000000	2520000000	4120000000	0.61165	38124
XP_006565423.1	clathrin light chain isoform X2 [Apis mellifera]	26.38	12	2	2		66500000	64200000	58300000	94600000	107000000	107000000	63000000	103000000	0.61165	23089
NP_001011627.1	phenoloxidase subunit A3 [Apis mellifera]	21.15	21	12	12		96900000	115000000	103000000	169000000	173000000	171000000	30100000	49200000	0.611789	80094
XP_006560146.1	tropomyosin-1 [Apis mellifera]	23.69	31	7	7		297000000	284000000	345000000	474000000	503000000	546000000	202000000	329000000	0.613982	32157
XP_001121882.2	ATP synthase-coupling factor 6 mitochondrial [Apis mellifera]	31.14	13	1	1		118000000	121000000	103000000	195000000	185000000	176000000	114000000	185000000	0.616216	10958
XP_397261.2	ubiquitin-conjugating enzyme E2 L3 [Apis mellifera]	22.33	42	5	5	Carbamidomethylation	114000000	120000000	106000000	170000000	173000000	177000000	62500000	101000000	0.618812	18172
XP_006557554.1	40S ribosomal protein S12 [Apis mellifera]	25	50	7	7	Carbamidomethylation	1250000000	1470000000	1420000000	2120000000	2390000000	2480000000	1160000000	1870000000	0.620321	15274
XP_006566452.2	alpha-tocopherol transfer protein isoform X1 [Apis mellifera]	36.5	28	9	9	Carbamidomethylation	242000000	246000000	235000000	397000000	408000000	411000000	159000000	256000000	0.621094	39730
XP_006563740.2	trans-1 2-dihydrobenzene-1 2-diol dehydrogenase [Apis mellifera]	30.52	16	3	3	Carbamidomethylation	32900000	37600000	33300000	53800000	54200000	59300000	34600000	55700000	0.621185	36908
XP_001120471.1	3-hydroxyacyl-CoA dehydrogenase type-2 [Apis mellifera]	38.09	75	12	12		1290000000	1340000000	1230000000	1940000000	2000000000	1830000000	758000000	1220000000	0.621311	27099
XP_001121212.2	U6 snRNA-associated Sm-like protein LSm7 isoform X3 [Apis mellifera]	25.71	36	2	2		88100000	107000000	94700000	156000000	149000000	159000000	96600000	155000000	0.623226	12264
XP_016769017.1	chitinase-like protein EN03 isoform X1 [Apis mellifera]	39.2	53	15	15	Carbamidomethylation	1390000000	1480000000	1490000000	2170000000	2280000000	2290000000	583000000	935000000	0.623529	49330
XP_026297098.1	transcription factor BTF3 homolog 4 [Apis mellifera]	32.03	53	6	6		475000000	534000000	486000000	756000000	741000000	791000000	371000000	595000000	0.623529	20027
XP_395357.3	nucleolysin TIAR [Apis mellifera]	42.24	21	5	5	Carbamidomethylation	205000000	212000000	218000000	317000000	334000000	330000000	151000000	242000000	0.623967	43346
XP_026299014.1	titin isoform X2 [Apis mellifera]	29.78	1	2	2	Carbamidomethylation	7920000	8660000	9290000	14000000	14500000	13000000	8620000	13800000	0.624638	214004
XP_006557408.2	succinate--CoA ligase [ADP/GDP-forming] subunit alpha mitochondrial isoform X2 [Apis mellifera]	22.78	10	3	3	Carbamidomethylation	75000000	72500000	78100000	120000000	111000000	106000000	46300000	74100000	0.624831	35334
XP_394373.1	coiled-coil domain-containing protein 124 [Apis mellifera]	21.65	10	1	1		11200000	12300000	11600000	17600000	18300000	20300000	11700000	18700000	0.625668	23844
XP_001122230.1	mitochondrial import inner membrane translocase subunit Tim8 [Apis mellifera]	27.04	26	2	2	Carbamidomethylation	96500000	107000000	103000000	153000000	165000000	172000000	102000000	163000000	0.625767	9818
XP_006568872.1	ran-specific GTPase-activating protein isoform X2 [Apis mellifera]	28.87	14	3	3	Carbamidomethylation	40100000	46200000	42600000	64000000	71100000	70900000	43000000	68700000	0.62591	28937
XP_392405.3	alpha-crystallin B chain isoform X1 [Apis mellifera]	29.23	47	7	1		137000000	143000000	121000000	210000000	208000000	221000000	134000000	213000000	0.629108	25565
XP_393076.1	Golgi reassembly-stacking protein 2 [Apis mellifera]	22.51	3	1	1	Carbamidomethylation	4700000	5790000	5340000	8170000	7720000	9160000	5270000	8350000	0.631138	46613
XP_016772427.1	leucine-rich repeat-containing protein 70 [Apis mellifera]	31.45	17	8	8		300000000	290000000	305000000	420000000	481000000	452000000	202000000	320000000	0.63125	42779
NP_001011592.1	tetraspanin 6 [Apis mellifera]	22.73	3	1	1		2940000	2370000	2480000	3930000	4200000	4140000	2600000	4090000	0.635697	25326
NP_001171498.1	superoxide dismutase 1 [Apis mellifera]	34.39	80	9	9	Carbamidomethylation	2650000000	3030000000	2790000000	4290000000	4500000000	4290000000	1540000000	2420000000	0.636364	15634
XP_016772675.1	12 kDa FK506-binding protein [Apis mellifera]	25.08	64	5	5	Carbamidomethylation	668000000	684000000	688000000	1060000000	858000000	1160000000	480000000	754000000	0.636605	11764
NP_001229473.1	peptidyl-prolyl cis-trans isomerase B precursor [Apis mellifera]	37.4	44	7	7	Carbamidomethylation	225000000	218000000	215000000	342000000	377000000	312000000	121000000	190000000	0.636842	22644
XP_006563745.1	transitional endoplasmic reticulum ATPase TER94 [Apis mellifera]	43.82	49	34	33	Carbamidomethylation; Oxidation (M)	2980000000	3080000000	3090000000	4050000000	4210000000	4090000000	645000000	1010000000	0.638614	88895
XP_026298285.1	apolipophorins [Apis mellifera]	26.49	47	132	132	Carbamidomethylation; Oxidation (M)	8520000000	9420000000	8960000000	12800000000	13400000000	13300000000	640000000	998000000	0.641283	376811
XP_624580.1	probable histone-binding protein Caf1 isoform X2 [Apis mellifera]	68.21	42	10	9	Carbamidomethylation	663000000	658000000	655000000	1020000000	1020000000	1040000000	658000000	1020000000	0.645098	48175
XP_392857.2	lysosomal aspartic protease [Apis mellifera]	26.23	48	12	12	Carbamidomethylation	407000000	448000000	388000000	598000000	637000000	580000000	228000000	355000000	0.642254	42222
XP_396656.1	Na(+)/H(+) exchange regulatory cofactor NHE-RF1 [Apis mellifera]	22.51	43	6	6		179000000	198000000	203000000	282000000	340000000	328000000	133000000	207000000	0.642512	28555
XP_016766883.1	ras-like GTP-binding protein Rho1 isoform X3 [Apis mellifera]	20.08	11	2	2	Carbamidomethylation	46200000	52400000	45600000	67700000	81900000	74800000	48100000	74800000	0.643048	23187
XP_006561099.1	grpE protein homolog mitochondrial [Apis mellifera]	21.96	36	7	7		422000000	416000000	407000000	589000000	637000000	642000000	249000000	387000000	0.643411	27069
XP_624910.1	10 kDa heat shock protein mitochondrial [Apis mellifera]	24.4	66	9	9		6730000000	7740000000	7500000000	11200000000	11700000000	10800000000	4300000000	6670000000	0.644678	11403
XP_396161.2	calcyclin-binding protein [Apis mellifera]	29.21	64	14	14	Carbamidomethylation	964000000	1150000000	1050000000	1540000000	1710000000	1730000000	435000000	674000000	0.645401	25922
XP_003251332.1	methionine-R-sulfoxide reductase B1 isoform X1 [Apis mellifera]	24.59	42	5	5	Carbamidomethylation	173000000	181000000	180000000	272000000	283000000	297000000	163000000	252000000	0.646825	22310
XP_006557802.1	cathepsin L1 [Apis mellifera]	24.84	27	8	8	Carbamidomethylation	318000000	336000000	330000000	487000000	477000000	452000000	125000000	193000000	0.647668	38774
XP_006571155.1	nascent polypeptide-associated complex subunit alpha isoform X2 [Apis mellifera]	32.49	36	8	8	Carbamidomethylation	1300000000	1450000000	1350000000	1990000000	1990000000	2080000000	942000000	1450000000	0.649655	22684
XP_006569730.1	spidroin-2 isoform X4 [Apis mellifera]	21.02	22	6	1		17400000	23100000	21400000	29400000	32000000	33700000	20600000	31700000	0.649842	39569
XP_006570877.1	nucleoplasmin-like protein isoform X2 [Apis mellifera]	23.37	35	4	4		340000000	401000000	327000000	535000000	573000000	509000000	314000000	481000000	0.652807	18832
XP_001121022.1	copper transport protein ATOX1 [Apis mellifera]	21.13	44	3	3		93300000	92100000	101000000	147000000	141000000	162000000	58700000	89700000	0.654404	8022
XP_623921.1	adenylate kinase [Apis mellifera]	33.44	30	6	6	Carbamidomethylation	109000000	97700000	104000000	151000000	152000000	165000000	33700000	51400000	0.655642	28514
XP_625023.1	mesencephalic astrocyte-derived neurotrophic factor homolog [Apis mellifera]	30.61	12	2	2		100000000	107000000	95700000	158000000	158000000	145000000	101000000	154000000	0.655844	20068
XP_006558545.1	histidine triad nucleotide-binding protein 1 [Apis mellifera]	26.24	40	3	3	Carbamidomethylation	153000000	149000000	136000000	210000000	237000000	219000000	146000000	222000000	0.657658	17628
XP_393161.3	lysozyme [Apis mellifera]	32.3	16	1	1		19300000	18800000	20300000	29600000	29000000	29400000	19400000	29300000	0.662116	17112
XP_016772827.1	ubiquitin carboxyl-terminal hydrolase isoform X2 [Apis mellifera]	26.17	39	6	6	Carbamidomethylation	276000000	305000000	278000000	392000000	400000000	394000000	167000000	252000000	0.662698	25721
XP_006567699.1	neurochondrin homolog [Apis mellifera]	20.61	4	2	2	Carbamidomethylation	4440000	4840000	4760000	6670000	6830000	7670000	4680000	7060000	0.66289	84246
XP_001119982.2	60 kDa SS-A/Ro ribonucleoprotein [Apis mellifera]	20.34	3	1	1		16600000	20900000	20000000	26800000	31800000	27700000	19100000	28800000	0.663194	62140
XP_026296371.1	eukaryotic translation initiation factor 5A [Apis mellifera]	22.53	38	8	8	Carbamidomethylation	1010000000	1130000000	1140000000	1710000000	1480000000	1640000000	746000000	1120000000	0.666071	17592
XP_006563433.2	heparanase isoform X1 [Apis mellifera]	25.02	3	1	1		8930000	9250000	9000000	13700000	13000000	14100000	9060000	13600000	0.666176	60122
XP_006561087.1	TPPP family protein CG45057 [Apis mellifera]	23.91	26	5	5		62100000	65300000	61000000	89400000	116000000	100000000	48200000	72300000	0.666667	25577
XP_003249139.1	sulfide:quinone oxidoreductase mitochondrial [Apis mellifera]	25.5	17	7	7		87300000	95300000	100000000	123000000	133000000	130000000	58900000	88000000	0.669318	51530
XP_001121522.1	mitochondrial import inner membrane translocase subunit Tim13 [Apis mellifera]	30.34	28	2	2	Carbamidomethylation	34100000	38100000	34700000	51900000	54300000	53300000	35700000	53200000	0.671053	10360
XP_392468.3	charged multivesicular body protein 5 [Apis mellifera]	24.08	23	3	3	Carbamidomethylation	51100000	58000000	56500000	83100000	81300000	82400000	55200000	82200000	0.671533	24608
XP_006568093.2	muscle-specific protein 20 [Apis mellifera]	22.58	42	7	7		483000000	530000000	509000000	735000000	757000000	815000000	438000000	652000000	0.671779	20406
XP_623084.1	aldehyde dehydrogenase mitochondrial [Apis mellifera]	38.34	47	14	14	Carbamidomethylation	446000000	467000000	471000000	597000000	604000000	587000000	144000000	214000000	0.672897	55686
XP_396824.1	major royal jelly protein 1 [Apis mellifera]	37.02	24	7	7	Carbamidomethylation	822000000	838000000	769000000	1180000000	1160000000	1080000000	444000000	657000000	0.675799	40940
XP_006568270.2	nuclear pore complex protein Nup50 isoform X2 [Apis mellifera]	21.25	6	2	2		59400000	57700000	58800000	86600000	81900000	91100000	58600000	86500000	0.677457	58023
XP_026298483.1	la-related protein 4 isoform X4 [Apis mellifera]	31.38	13	6	6	Carbamidomethylation	70300000	70900000	73600000	91900000	89100000	96200000	40100000	59100000	0.678511	80987
XP_397589.3	eukaryotic translation initiation factor 3 subunit J [Apis mellifera]	27.41	23	5	5		148000000	160000000	137000000	203000000	223000000	223000000	112000000	165000000	0.678788	27392
XP_006561879.2	putative uncharacterized protein DDB_G0282133 isoform X2 [Apis mellifera]	22.28	6	4	4	Carbamidomethylation	33600000	27800000	29900000	41500000	42700000	45300000	26200000	38500000	0.680519	106451
XP_016769086.2	luciferin 4-monooxygenase isoform X2 [Apis mellifera]	26.18	14	4	4		60700000	60800000	58100000	85200000	82600000	90700000	51200000	75200000	0.680851	57105
XP_394112.2	fumarylacetoacetate hydrolase domain-containing protein 2A isoform X2 [Apis mellifera]	39.09	30	8	8		367000000	372000000	359000000	559000000	519000000	565000000	229000000	335000000	0.683582	36722
XP_003250702.1	glutaredoxin-C4 isoform X2 [Apis mellifera]	22.05	70	5	5	Carbamidomethylation	114000000	142000000	124000000	178000000	196000000	191000000	84800000	124000000	0.683871	10942
XP_016766933.1	protein artichoke [Apis mellifera]	44.65	22	11	11	Carbamidomethylation	327000000	347000000	329000000	435000000	480000000	451000000	166000000	242000000	0.68595	75706
XP_026297646.1	hydroxyacylglutathione hydrolase mitochondrial isoform X2 [Apis mellifera]	28.65	12	5	5		80500000	83100000	82800000	117000000	118000000	121000000	61300000	89300000	0.68645	60950
XP_016767980.1	troponin T skeletal muscle isoform X4 [Apis mellifera]	35.25	22	9	9		274000000	302000000	300000000	431000000	457000000	446000000	154000000	224000000	0.6875	44427
XP_006560659.1	proliferation-associated protein 2G4 [Apis mellifera]	23.53	32	7	7	Carbamidomethylation	562000000	601000000	606000000	797000000	856000000	807000000	399000000	579000000	0.689119	43835
XP_026296654.1	leucine-rich repeat transmembrane neuronal protein 4-like [Apis mellifera]	23.95	29	11	4	Carbamidomethylation	88100000	88900000	80900000	112000000	113000000	122000000	68400000	99200000	0.689516	50286
XP_395981.2	protein disulfide-isomerase A6 homolog [Apis mellifera]	32.37	45	14	14	Carbamidomethylation	717000000	749000000	703000000	1040000000	1090000000	1000000000	205000000	297000000	0.690236	47196
XP_026301574.1	protein FAM192A [Apis mellifera]	26.74	12	2	2		18200000	19800000	18600000	25700000	28500000	27200000	18800000	27100000	0.693727	30528
XP_001120364.1	60S acidic ribosomal protein P2 [Apis mellifera]	20.27	64	7	7		771000000	798000000	806000000	1160000000	1130000000	1050000000	631000000	908000000	0.694934	12000
XP_026299545.1	splicing factor U2AF 50 kDa subunit isoform X3 [Apis mellifera]	26	13	4	4	Carbamidomethylation	65800000	65500000	70900000	96800000	94600000	94200000	60000000	86300000	0.695249	48184
XP_392478.2	malate dehydrogenase mitochondrial [Apis mellifera]	28.45	73	22	22	Carbamidomethylation	3180000000	3450000000	3200000000	4490000000	4390000000	4300000000	1010000000	1450000000	0.696552	35802
XP_016767118.1	microtubule-associated protein Jupiter isoform X2 [Apis mellifera]	24.28	27	3	3		56100000	61100000	63400000	80000000	90200000	88300000	60200000	86200000	0.698376	25007
XP_016773511.1	rho GTPase-activating protein gacU [Apis mellifera]	20.89	24	16	16	Carbamidomethylation	1130000000	1290000000	1230000000	2000000000	1900000000	2050000000	496000000	706000000	0.70255	107095
XP_026300505.1	piezo-type mechanosensitive ion channel component isoform X3 [Apis mellifera]	21.46	0	1	1		59600000	72700000	62800000	94100000	95600000	87500000	65000000	92400000	0.703463	290582
XP_624102.1	electron transfer flavoprotein subunit alpha mitochondrial [Apis mellifera]	31.91	36	10	10	Carbamidomethylation	291000000	289000000	296000000	468000000	457000000	438000000	145000000	205000000	0.707317	35379
XP_392923.5	nuclear valosin-containing protein-like [Apis mellifera]	26.98	10	5	5	Carbamidomethylation	35300000	33600000	32600000	49100000	43700000	46900000	20200000	28500000	0.708772	104286
XP_006571545.1	chromatin complexes subunit BAP18 isoform X3 [Apis mellifera]	20.13	19	2	2		27800000	28600000	31900000	43200000	37600000	43500000	29400000	41400000	0.710145	13247
XP_016768230.1	putative protein FAM10A4 [Apis mellifera]	33.51	30	10	10	Carbamidomethylation	377000000	405000000	395000000	617000000	655000000	643000000	210000000	294000000	0.714286	42478
XP_026301285.1	PCNA-associated factor isoform X2 [Apis mellifera]	21.11	41	2	2	Carbamidomethylation	21400000	25000000	21400000	30800000	32600000	31500000	22600000	31600000	0.71519	9695
XP_394993.2	proteasome subunit beta type-4 [Apis mellifera]	25.1	46	10	10	Carbamidomethylation	326000000	457000000	415000000	566000000	576000000	424000000	171000000	239000000	0.715481	30057
XP_026299440.1	dihydrolipoyllysine-residue acetyltransferase component of pyruvate dehydrogenase complex mitochondrial [Apis mellifera]	49.07	20	8	8		131000000	147000000	139000000	208000000	181000000	196000000	80900000	113000000	0.715929	54385
XP_392078.2	myophilin [Apis mellifera]	22.96	27	4	4	Carbamidomethylation	82800000	95000000	86200000	119000000	118000000	110000000	70900000	98900000	0.716886	19097
XP_006563042.1	guanine nucleotide-binding protein G(I)/G(S)/G(T) subunit beta-1 [Apis mellifera]	29.22	13	2	2	Carbamidomethylation	27900000	26900000	25900000	39000000	37500000	35900000	26900000	37500000	0.717333	37370
XP_016767143.1	dynein light chain roadblock-type 2 [Apis mellifera]	22.8	34	2	2		36200000	35700000	30700000	49300000	48000000	45500000	34200000	47600000	0.718487	10802
XP_016773166.1	ubiquitin-conjugating enzyme E2-22 kDa isoform X1 [Apis mellifera]	20.59	22	3	3	Carbamidomethylation	63200000	65200000	76800000	88900000	100000000	96100000	68400000	95100000	0.719243	22502
XP_026298966.1	fumarate hydratase mitochondrial isoform X1 [Apis mellifera]	30.49	15	5	5		179000000	188000000	173000000	246000000	250000000	249000000	154000000	214000000	0.719626	55206
XP_006562000.1	transmembrane emp24 domain-containing protein [Apis mellifera]	33.13	14	2	2	Carbamidomethylation	50600000	53000000	48400000	68600000	71900000	69600000	50600000	70000000	0.722857	23411
XP_391855.2	nuclear migration protein nudC [Apis mellifera]	21.47	33	10	10		667000000	715000000	686000000	917000000	996000000	948000000	459000000	632000000	0.726266	38098
NP_001171496.1	thioredoxin reductase 1 isoform 1 [Apis mellifera]	28.16	39	18	18	Carbamidomethylation	1110000000	1240000000	1170000000	1340000000	1350000000	1370000000	277000000	381000000	0.727034	59246
XP_026296339.1	very-long-chain enoyl-CoA reductase isoform X2 [Apis mellifera]	26.6	6	3	3		28400000	28200000	28200000	39700000	38000000	38900000	28300000	38900000	0.727506	55396
XP_026300272.1	protein CREG1 [Apis mellifera]	23.71	5	1	1		22900000	25100000	21400000	32800000	32600000	29700000	23100000	31700000	0.728707	33763
XP_016770365.1	thymosin beta isoform X1 [Apis mellifera]	30.88	43	7	1		99200000	109000000	107000000	138000000	148000000	145000000	105000000	144000000	0.729167	18462
XP_393211.4	short/branched chain specific acyl-CoA dehydrogenase mitochondrial [Apis mellifera]	26.23	26	8	8	Carbamidomethylation	217000000	248000000	242000000	306000000	317000000	311000000	126000000	172000000	0.732558	45940
XP_026299604.1	antichymotrypsin-2 isoform X9 [Apis mellifera]	22.79	27	9	9		289000000	310000000	306000000	378000000	377000000	408000000	137000000	187000000	0.73262	43457
XP_001120363.1	ubiquitin-fold modifier 1 isoform X2 [Apis mellifera]	22.82	49	2	2		49500000	52400000	48700000	72700000	67300000	65400000	50200000	68500000	0.732847	9448
XP_006560660.1	NEDD8-activating enzyme E1 catalytic subunit [Apis mellifera]	22.33	12	3	3	Carbamidomethylation	19600000	21800000	22900000	29200000	30000000	28200000	21400000	29100000	0.735395	49395
XP_624456.2	saccharopine dehydrogenase-like oxidoreductase [Apis mellifera]	21.79	23	12	12	Carbamidomethylation	241000000	266000000	241000000	324000000	347000000	305000000	109000000	148000000	0.736486	78098
XP_625125.2	glucosidase 2 subunit beta [Apis mellifera]	20.24	35	10	10	Carbamidomethylation	387000000	418000000	399000000	522000000	531000000	572000000	207000000	281000000	0.736655	59829
XP_393875.1	chromobox protein homolog 1 [Apis mellifera]	21.82	26	5	5		111000000	130000000	136000000	159000000	173000000	174000000	94300000	128000000	0.736719	21108
XP_392511.2	eukaryotic translation initiation factor 5 [Apis mellifera]	28.73	23	10	10		271000000	279000000	251000000	333000000	317000000	333000000	78100000	106000000	0.736792	50939
XP_003251671.1	innexin inx2 [Apis mellifera]	21.25	5	1	1		30300000	34700000	31900000	42600000	41500000	47200000	32300000	43800000	0.737443	41573
XP_016771943.1	proteasome subunit alpha type-1 [Apis mellifera]	41.71	54	10	10	Carbamidomethylation	495000000	543000000	518000000	624000000	689000000	651000000	226000000	306000000	0.738562	30927
XP_394885.1	NADH dehydrogenase [ubiquinone] iron-sulfur protein 3 mitochondrial [Apis mellifera]	27.98	18	3	3	Carbamidomethylation	79700000	70900000	73800000	97000000	104000000	102000000	74800000	101000000	0.740594	30544
XP_026296548.1	annexin B9 [Apis mellifera]	28.97	76	24	22	Carbamidomethylation	731000000	773000000	743000000	959000000	971000000	930000000	209000000	282000000	0.741135	36154
XP_026299083.1	farnesol dehydrogenase [Apis mellifera]	28.53	35	6	6	Carbamidomethylation	119000000	127000000	120000000	170000000	170000000	165000000	77100000	104000000	0.741346	29193
XP_624715.1	UBX domain-containing protein 1 [Apis mellifera]	21.73	24	5	5		114000000	128000000	117000000	173000000	187000000	185000000	79400000	107000000	0.742056	36409
XP_392097.5	collagen alpha-1(IV) chain [Apis mellifera]	26.19	10	11	11	Carbamidomethylation; Oxidation (M)	741000000	732000000	825000000	965000000	1040000000	1030000000	483000000	650000000	0.743077	190943
XP_006571340.1	mitochondrial import inner membrane translocase subunit Tim10 [Apis mellifera]	20.4	11	1	1		17000000	20500000	19700000	27000000	26000000	24100000	19100000	25700000	0.743191	10456
XP_006563710.1	RWD domain-containing protein 1 isoform X2 [Apis mellifera]	20.42	11	1	1		6810000	7000000	7770000	9710000	9520000	9810000	7200000	9680000	0.743802	25602
XP_006568873.1	endoplasmic reticulum resident protein 29 [Apis mellifera]	30.46	51	14	14	Carbamidomethylation	311000000	328000000	305000000	507000000	521000000	506000000	151000000	203000000	0.743842	27543
XP_006568343.1	transcription elongation regulator 1 isoform X5 [Apis mellifera]	26.88	5	3	3	Carbamidomethylation	27900000	28200000	30600000	37200000	38400000	40700000	28900000	38800000	0.744845	134094
XP_003250264.2	uncharacterized protein LOC100576569 [Apis mellifera]	22.23	7	8	8	Carbamidomethylation	119000000	129000000	130000000	158000000	162000000	170000000	67000000	89800000	0.746102	217468
XP_001119884.1	protein lethal(2)essential for life [Apis mellifera]	20.92	25	3	3		29800000	33500000	29500000	42200000	40500000	41300000	30900000	41400000	0.746377	22560
XP_392658.2	sorting nexin-12 [Apis mellifera]	24.7	44	7	7		161000000	160000000	155000000	212000000	205000000	225000000	108000000	144000000	0.75	19008
XP_006569136.1	CD151 antigen [Apis mellifera]	23.75	5	1	1	Carbamidomethylation	14200000	13100000	13200000	18100000	18000000	17800000	13500000	18000000	0.75	26229
XP_395047.5	phosphoglycerate kinase [Apis mellifera]	27.5	59	22	22	Carbamidomethylation	2170000000	2130000000	2140000000	2790000000	2910000000	2940000000	493000000	657000000	0.750381	44992
XP_392905.2	cAMP-dependent protein kinase type II regulatory subunit isoform X1 [Apis mellifera]	25.57	11	3	3		47900000	49300000	52100000	66200000	67000000	65500000	49700000	66200000	0.750755	43868
XP_623194.2	protein D2 isoform X2 [Apis mellifera]	20.75	40	7	7		922000000	1030000000	994000000	1310000000	1290000000	1210000000	745000000	991000000	0.751766	23645
XP_392065.2	upstream activation factor subunit spp27 [Apis mellifera]	25.56	17	5	5	Carbamidomethylation	308000000	334000000	300000000	492000000	462000000	464000000	246000000	327000000	0.752294	29223
XP_016766172.1	uncharacterized protein LOC100578571 [Apis mellifera]	24.48	58	18	18	Carbamidomethylation	4430000000	4790000000	4650000000	6210000000	5660000000	6110000000	2240000000	2970000000	0.754209	50990
XP_006563883.1	phosphatidylinositol-binding clathrin assembly protein unc-11 isoform X2 [Apis mellifera]	20.71	12	8	1	Carbamidomethylation; Oxidation (M)	7770000	7630000	6710000	9480000	10000000	9660000	7370000	9730000	0.757451	93699
XP_016769951.1	tumor protein D53 homolog isoform X1 [Apis mellifera]	25.79	15	6	6		228000000	243000000	258000000	323000000	346000000	331000000	204000000	269000000	0.758364	41620
XP_006561085.2	LOW QUALITY PROTEIN: probable tRNA (guanine(26)-N(2))-dimethyltransferase [Apis mellifera]	24.26	13	10	9	Carbamidomethylation	195000000	208000000	213000000	301000000	326000000	274000000	97900000	129000000	0.758915	94505
XP_006559389.1	inosine triphosphate pyrophosphatase [Apis mellifera]	21.84	31	5	5	Carbamidomethylation	63600000	73500000	67400000	101000000	98300000	93600000	57000000	75100000	0.758988	21431
XP_006559771.1	actin-related protein 2/3 complex subunit 5 [Apis mellifera]	25.75	44	3	3		76600000	85300000	77100000	102000000	104000000	109000000	79700000	105000000	0.759048	17340
XP_001120943.2	nucleolin 1 isoform X1 [Apis mellifera]	23.45	9	6	6		201000000	231000000	221000000	254000000	273000000	230000000	137000000	180000000	0.761111	85222
XP_006570759.1	glutathione peroxidase-like 1 isoform X1 [Apis mellifera]	24.78	40	6	6	Carbamidomethylation	121000000	123000000	124000000	166000000	163000000	167000000	83900000	110000000	0.762727	21785
XP_003250408.1	thioredoxin-2 [Apis mellifera]	29.94	13	2	2		484000000	539000000	523000000	653000000	610000000	695000000	283000000	371000000	0.762803	12017
XP_006566426.1	stress response protein NST1 isoform X1 [Apis mellifera]	20.76	30	9	9	Carbamidomethylation	1300000000	1470000000	1400000000	1840000000	1920000000	1870000000	1030000000	1350000000	0.762963	39745
XP_006564611.1	ran-binding protein 3 isoform X2 [Apis mellifera]	20.43	30	8	8	Carbamidomethylation	188000000	184000000	197000000	249000000	260000000	263000000	98800000	129000000	0.765891	47432
XP_003249382.1	inorganic pyrophosphatase [Apis mellifera]	22.8	41	10	10	Carbamidomethylation	274000000	295000000	276000000	380000000	412000000	387000000	132000000	172000000	0.767442	37661
XP_394881.4	leucine-rich repeat-containing protein 47 [Apis mellifera]	28.93	27	9	9	Carbamidomethylation	209000000	225000000	267000000	292000000	300000000	269000000	88300000	115000000	0.767826	60225
XP_392330.1	40S ribosomal protein S24 [Apis mellifera]	23.07	12	2	2		199000000	207000000	185000000	249000000	248000000	251000000	179000000	233000000	0.76824	15343
XP_026294726.1	AP-1 complex subunit beta-1 isoform X2 [Apis mellifera]	20.32	11	7	7	Carbamidomethylation	107000000	119000000	113000000	123000000	117000000	118000000	43800000	56900000	0.769772	102076
XP_623518.1	pyridoxal phosphate homeostasis protein [Apis mellifera]	20.84	7	1	1		20400000	22000000	20500000	28200000	28100000	25400000	21000000	27200000	0.772059	28299
NP_001091636.1	profilin [Apis mellifera]	21.83	73	6	6	Carbamidomethylation	1880000000	1980000000	2240000000	2530000000	2780000000	2760000000	1630000000	2110000000	0.772512	13803
XP_393411.1	ubiquitin-conjugating enzyme E2 variant 2 [Apis mellifera]	21.59	22	4	4	Carbamidomethylation	283000000	323000000	317000000	373000000	415000000	424000000	269000000	348000000	0.772989	16360
XP_016771285.1	protein l(2)37Cc [Apis mellifera]	21.31	75	15	15		3550000000	3870000000	3730000000	4750000000	5050000000	4570000000	1710000000	2210000000	0.773756	30011
XP_026298920.1	nucleoprotein TPR isoform X1 [Apis mellifera]	21.83	11	4	4		34200000	39800000	35400000	48300000	49200000	45200000	33800000	43600000	0.775229	65324
XP_006567267.1	stress-induced-phosphoprotein 1 [Apis mellifera]	20.54	50	24	24	Carbamidomethylation	1940000000	2020000000	1950000000	2580000000	2750000000	2690000000	521000000	672000000	0.775298	61498
XP_623282.2	protein disulfide-isomerase A3 [Apis mellifera]	23.32	52	26	26	Carbamidomethylation	2040000000	2190000000	2190000000	2850000000	2900000000	3030000000	515000000	664000000	0.775602	55847
XP_392379.2	protein enabled [Apis mellifera]	20.42	11	4	4	Carbamidomethylation	55800000	59900000	63000000	73600000	77800000	72900000	52300000	67400000	0.775964	49825
XP_003251613.1	histone H2A [Apis mellifera]	21.43	60	6	4		1240000000	1190000000	1110000000	1590000000	1450000000	1560000000	1040000000	1340000000	0.776119	13391
XP_391905.2	proteasome subunit beta type-7 [Apis mellifera]	24.76	29	6	6	Carbamidomethylation	258000000	261000000	287000000	344000000	342000000	351000000	236000000	304000000	0.776316	30306
XP_001122218.1	histone H2B [Apis mellifera]	21.98	35	4	2		66900000	75800000	67600000	87300000	94000000	88800000	70100000	90100000	0.778024	14058
XP_623951.1	ras-related protein Rac1 [Apis mellifera]	20.12	29	5	4	Carbamidomethylation	105000000	117000000	120000000	134000000	141000000	152000000	76800000	98500000	0.779695	21469
XP_006560480.1	heterogeneous nuclear ribonucleoprotein 27C isoform X3 [Apis mellifera]	21.71	30	8	8	Carbamidomethylation	909000000	1010000000	912000000	1280000000	1240000000	1190000000	662000000	847000000	0.781582	47215
XP_006571751.1	zinc finger CCCH domain-containing protein 15 homolog [Apis mellifera]	23.63	8	3	3	Carbamidomethylation	26600000	28900000	28900000	34000000	36500000	37300000	28100000	35900000	0.78273	45614
XP_395543.4	SWI/SNF-related matrix-associated actin-dependent regulator of chromatin subfamily E member 1 [Apis mellifera]	26.76	2	1	1		11900000	10900000	10900000	14200000	13900000	14700000	11200000	14300000	0.783217	79459
XP_006559914.2	zinc finger CCCH domain-containing protein 11A [Apis mellifera]	21.03	9	4	4	Carbamidomethylation	135000000	160000000	172000000	203000000	182000000	210000000	116000000	148000000	0.783784	65162
XP_006567256.1	cytochrome c oxidase subunit NDUFA4 [Apis mellifera]	21.32	18	1	1		56400000	62900000	57000000	70800000	79100000	75300000	58800000	75000000	0.784	9755
XP_026297420.1	protein lingerer isoform X6 [Apis mellifera]	22.49	12	8	8		139000000	163000000	160000000	172000000	189000000	195000000	81600000	104000000	0.784615	114907
XP_006563871.1	TAR DNA-binding protein 43 isoform X4 [Apis mellifera]	20.21	10	4	4	Carbamidomethylation	97200000	109000000	112000000	120000000	120000000	128000000	69300000	88300000	0.784824	48120
XP_016766652.1	spectrin alpha chain isoform X1 [Apis mellifera]	31.05	28	53	53		1210000000	1290000000	1230000000	1370000000	1450000000	1410000000	135000000	172000000	0.784884	280146
XP_624548.2	AFG3-like protein 2 [Apis mellifera]	31.88	10	7	7		85000000	81700000	88200000	96900000	102000000	99300000	37300000	47500000	0.785263	91106
XP_026301100.1	uncharacterized protein DDB_G0289975 [Apis mellifera]	22.42	1	1	1		4790000	4560000	4650000	6200000	5930000	5680000	4670000	5940000	0.786195	116406
XP_395004.3	alpha-2-macroglobulin receptor-associated protein [Apis mellifera]	22.78	21	7	7		119000000	133000000	128000000	145000000	157000000	149000000	64800000	82400000	0.786408	42970
XP_026297168.1	glucose 1 6-bisphosphate synthase isoform X2 [Apis mellifera]	21.15	13	7	7		102000000	118000000	108000000	139000000	137000000	136000000	61400000	78000000	0.787179	66577
XP_016768218.1	lon protease homolog mitochondrial isoform X1 [Apis mellifera]	20.79	32	20	20	Carbamidomethylation	368000000	408000000	389000000	544000000	544000000	513000000	111000000	141000000	0.787234	114770
XP_392104.4	retinal dehydrogenase 1 [Apis mellifera]	23.84	30	8	8	Carbamidomethylation	222000000	215000000	218000000	274000000	293000000	285000000	92200000	117000000	0.788034	53173
XP_624231.2	mitochondrial proton/calcium exchanger protein [Apis mellifera]	21.71	17	10	10	Carbamidomethylation	176000000	181000000	165000000	210000000	214000000	193000000	108000000	137000000	0.788321	88830
XP_016767150.1	hexokinase-1 [Apis mellifera]	22.9	24	8	8	Carbamidomethylation	229000000	237000000	237000000	277000000	292000000	305000000	135000000	171000000	0.789474	52418
XP_395310.3	COP9 signalosome complex subunit 7b isoform X3 [Apis mellifera]	22.94	21	5	5	Carbamidomethylation	133000000	139000000	143000000	174000000	197000000	185000000	102000000	129000000	0.790698	31584
XP_006564250.2	myosin-I heavy chain isoform X1 [Apis mellifera]	31.21	0	1	1		9610000	10200000	9630000	12300000	12700000	12200000	9820000	12400000	0.791935	254450
XP_625154.1	signal recognition particle subunit SRP68 [Apis mellifera]	21.41	11	3	3		33300000	29600000	33400000	39700000	42600000	39300000	32100000	40500000	0.792593	66258
XP_393027.2	hsp70-binding protein 1 [Apis mellifera]	22.79	14	3	3	Carbamidomethylation	47700000	48300000	44400000	56500000	62000000	57900000	46800000	58800000	0.795918	42752
XP_392812.2	60S ribosomal protein L23 [Apis mellifera]	25.09	46	6	6	Carbamidomethylation	567000000	604000000	576000000	709000000	693000000	675000000	442000000	555000000	0.796396	14807
XP_016771613.1	RNA-binding protein lark isoform X3 [Apis mellifera]	24.77	57	15	15	Carbamidomethylation	2850000000	3050000000	3030000000	3660000000	3820000000	3890000000	940000000	1180000000	0.79661	34986
XP_006564892.1	ATP synthase subunit beta mitochondrial [Apis mellifera]	31.98	63	24	24		6070000000	7160000000	6100000000	7440000000	7880000000	6930000000	1260000000	1580000000	0.797468	55130
XP_006572159.1	probable pyruvate dehydrogenase E1 component subunit alpha mitochondrial isoform X2 [Apis mellifera]	27.01	23	8	8	Carbamidomethylation	344000000	354000000	375000000	407000000	429000000	441000000	205000000	257000000	0.797665	43853
XP_026297640.1	T-complex protein 1 subunit zeta [Apis mellifera]	26.05	58	25	25	Carbamidomethylation	1630000000	1730000000	1650000000	1930000000	1940000000	1950000000	439000000	549000000	0.799636	58311
XP_006565856.1	facilitated trehalose transporter Tret1 [Apis mellifera]	20.88	4	2	2		19600000	20800000	18700000	24800000	25500000	23100000	19700000	24500000	0.804082	60787
XP_016766950.1	acyl carrier protein mitochondrial isoform X3 [Apis mellifera]	21.09	23	5	5		473000000	524000000	466000000	631000000	601000000	600000000	453000000	563000000	0.804618	21634
XP_625098.1	V-type proton ATPase subunit E [Apis mellifera]	28.5	35	5	5	Carbamidomethylation	318000000	312000000	298000000	365000000	404000000	401000000	200000000	248000000	0.806452	26133
XP_624227.2	1 2-dihydroxy-3-keto-5-methylthiopentene dioxygenase isoform X1 [Apis mellifera]	26.39	41	6	6		48100000	44800000	46700000	58000000	56900000	57600000	33500000	41300000	0.811138	22439
XP_026299398.1	ubiquitin carboxyl-terminal hydrolase 7 isoform X4 [Apis mellifera]	24.47	12	9	9	Carbamidomethylation; Oxidation (M)	151000000	152000000	152000000	165000000	168000000	184000000	74900000	92300000	0.811484	127270
XP_395618.4	probable cytosolic oligopeptidase A isoform X1 [Apis mellifera]	24.92	4	2	2		19600000	19800000	18900000	23200000	24000000	24900000	19500000	24000000	0.8125	87554
XP_393232.4	nuclear pore glycoprotein p62 isoform X2 [Apis mellifera]	21.6	21	7	7	Carbamidomethylation	94700000	105000000	93300000	135000000	130000000	137000000	75300000	92500000	0.814054	47088
XP_001121223.1	isopentenyl-diphosphate Delta-isomerase 1 isoform X1 [Apis mellifera]	21.07	22	5	5	Carbamidomethylation	145000000	152000000	136000000	177000000	186000000	182000000	101000000	124000000	0.814516	28309
XP_026299984.1	proteasome subunit beta type-6 [Apis mellifera]	36.63	33	7	7	Carbamidomethylation	327000000	328000000	359000000	382000000	418000000	424000000	168000000	206000000	0.815534	25090
XP_392230.1	plastin-2 isoform X2 [Apis mellifera]	20.65	18	7	7	Carbamidomethylation	110000000	126000000	111000000	130000000	150000000	145000000	53200000	65100000	0.817204	70760
XP_624353.1	aldose reductase [Apis mellifera]	24.59	83	25	25	Carbamidomethylation	10600000000	10500000000	10800000000	12300000000	13900000000	14100000000	3410000000	4170000000	0.817746	36082
XP_026295545.1	vacuolar protein sorting-associated protein VTA1 homolog [Apis mellifera]	31.67	34	6	6	Carbamidomethylation	163000000	168000000	166000000	210000000	206000000	205000000	123000000	150000000	0.82	32520
XP_026301314.1	X-ray repair cross-complementing protein 5 [Apis mellifera]	20.21	9	3	3		31700000	33600000	30500000	39900000	36600000	39900000	31900000	38800000	0.822165	64919
XP_003251860.1	glucose-6-phosphate 1-epimerase [Apis mellifera]	21.86	39	7	7	Carbamidomethylation	536000000	440000000	497000000	525000000	555000000	562000000	227000000	276000000	0.822464	31877
XP_006560252.1	probable aconitate hydratase mitochondrial isoform X2 [Apis mellifera]	20.73	38	24	24	Carbamidomethylation	787000000	828000000	824000000	1040000000	1100000000	1050000000	237000000	288000000	0.822917	85514
XP_006572237.1	presequence protease mitochondrial [Apis mellifera]	20.89	22	15	14	Carbamidomethylation	189000000	218000000	205000000	245000000	248000000	226000000	81900000	99400000	0.823944	119599
XP_624109.1	ubiquitin-like protein 4A [Apis mellifera]	35.34	43	5	5		73300000	89700000	91100000	111000000	113000000	109000000	46900000	56800000	0.825704	16818
XP_006559119.1	eukaryotic translation initiation factor 3 subunit M [Apis mellifera]	28.62	16	6	6	Carbamidomethylation	113000000	125000000	116000000	146000000	161000000	160000000	71400000	86300000	0.827346	44477
XP_006559569.1	calreticulin [Apis mellifera]	22.64	54	22	22	Carbamidomethylation	2900000000	3090000000	3090000000	3910000000	4170000000	4090000000	869000000	1050000000	0.827619	47174
XP_006562243.2	papilin isoform X2 [Apis mellifera]	24.84	13	24	24	Carbamidomethylation	320000000	347000000	364000000	413000000	454000000	452000000	56200000	67800000	0.828909	315595
XP_006561975.1	40S ribosomal protein S17 [Apis mellifera]	21.7	25	3	3		312000000	272000000	289000000	356000000	387000000	346000000	262000000	314000000	0.834395	15378
XP_394075.2	SET and MYND domain-containing protein 5 [Apis mellifera]	20.17	6	2	2	Carbamidomethylation	14100000	15700000	14900000	17200000	18600000	17800000	14900000	17800000	0.837079	44140
XP_026297334.1	heterogeneous nuclear ribonucleoprotein M isoform X3 [Apis mellifera]	27.29	30	16	16	Carbamidomethylation	984000000	1080000000	1080000000	1250000000	1390000000	1330000000	569000000	679000000	0.837997	59067
XP_016770592.1	nuclear pore complex protein Nup98-Nup96 isoform X2 [Apis mellifera]	21.45	5	6	6		96800000	111000000	107000000	133000000	99000000	119000000	51500000	61400000	0.838762	198923
XP_624620.2	60S ribosomal protein L5 [Apis mellifera]	23.79	43	11	11	Carbamidomethylation	1400000000	1520000000	1540000000	1630000000	1720000000	1730000000	761000000	905000000	0.840884	34359
XP_395319.2	peroxiredoxin-6 [Apis mellifera]	26.57	40	8	8		139000000	139000000	145000000	166000000	174000000	173000000	92500000	110000000	0.840909	24923
XP_393509.2	mitochondrial-processing peptidase subunit beta [Apis mellifera]	24.02	29	10	10	Carbamidomethylation	703000000	742000000	706000000	859000000	862000000	876000000	354000000	419000000	0.844869	53349
XP_003249262.1	oxygen-dependent coproporphyrinogen-III oxidase [Apis mellifera]	23.08	15	4	4	Carbamidomethylation	23600000	22000000	22800000	26500000	27400000	27700000	19200000	22600000	0.849558	44834
XP_006564273.1	ras-related protein Rab-1A [Apis mellifera]	34.17	46	7	5	Carbamidomethylation	231000000	235000000	228000000	276000000	283000000	275000000	211000000	248000000	0.850806	23108
XP_026301520.1	uncharacterized protein C05D11.1 isoform X3 [Apis mellifera]	22.49	22	20	20	Carbamidomethylation	537000000	586000000	543000000	597000000	626000000	614000000	194000000	228000000	0.850877	116982
XP_392679.5	dihydrolipoyllysine-residue succinyltransferase component of 2-oxoglutarate dehydrogenase complex mitochondrial isoform X1 [Apis mellifera]	29.12	12	4	4	Carbamidomethylation	78300000	84200000	83000000	94500000	96100000	93000000	55300000	64900000	0.85208	55454
XP_026300442.1	spermidine synthase isoform X2 [Apis mellifera]	21.8	32	5	5	Carbamidomethylation	409000000	422000000	412000000	521000000	501000000	496000000	267000000	313000000	0.853035	24590
XP_623670.3	lysosomal Pro-X carboxypeptidase [Apis mellifera]	21.37	6	2	2	Carbamidomethylation	37700000	40700000	38000000	45100000	46500000	44500000	38800000	45400000	0.854626	56432
XP_006559437.1	coatomer subunit gamma isoform X2 [Apis mellifera]	23.77	27	15	15	Carbamidomethylation	397000000	389000000	410000000	433000000	452000000	432000000	130000000	152000000	0.855263	96451
XP_006564656.1	eukaryotic translation initiation factor 3 subunit C [Apis mellifera]	39.83	19	14	14	Carbamidomethylation	286000000	292000000	264000000	318000000	328000000	316000000	155000000	181000000	0.856354	104390
XP_016767773.1	translation elongation factor 2 isoform X1 [Apis mellifera]	24.04	49	35	35	Carbamidomethylation	4650000000	5100000000	4720000000	5710000000	5900000000	5750000000	1040000000	1210000000	0.859504	94582
XP_026301525.1	MICOS complex subunit MIC27 isoform X3 [Apis mellifera]	23.31	31	5	5		84400000	94700000	85900000	110000000	107000000	106000000	67500000	78300000	0.862069	26958
XP_623495.1	V-type proton ATPase catalytic subunit A [Apis mellifera]	21.76	51	25	25	Carbamidomethylation	1500000000	1470000000	1510000000	1670000000	1710000000	1780000000	489000000	566000000	0.863958	68373
XP_003251449.1	26S proteasome regulatory subunit 6B [Apis mellifera]	25.15	45	12	12	Carbamidomethylation	448000000	499000000	515000000	563000000	606000000	621000000	224000000	258000000	0.868217	47040
XP_016769151.1	dolichyl-diphosphooligosaccharide--protein glycosyltransferase 48 kDa subunit [Apis mellifera]	20.22	32	9	9		310000000	356000000	359000000	372000000	367000000	360000000	135000000	155000000	0.870968	48406
XP_006564630.1	ATP-binding cassette sub-family F member 3 isoform X2 [Apis mellifera]	25.31	3	2	2		23200000	23900000	22800000	25900000	27200000	26800000	23300000	26600000	0.87594	75098
XP_391880.2	elongation factor Tu mitochondrial [Apis mellifera]	30.65	43	16	16	Carbamidomethylation	1660000000	1710000000	1630000000	1870000000	1890000000	1850000000	598000000	675000000	0.885926	52421
XP_006561774.1	glycogen phosphorylase [Apis mellifera]	22.05	24	19	19	Carbamidomethylation	372000000	379000000	387000000	414000000	413000000	416000000	85900000	96600000	0.889234	97329
XP_392027.1	chloride intracellular channel exc-4 [Apis mellifera]	20.9	44	9	9	Carbamidomethylation	504000000	523000000	479000000	564000000	548000000	578000000	294000000	330000000	0.890909	29891
XP_623834.1	actin-related protein 1 [Apis mellifera]	33.82	30	7	7	Carbamidomethylation	211000000	225000000	211000000	190000000	230000000	233000000	110000000	123000000	0.894309	42668
XP_026298414.1	glycerol-3-phosphate dehydrogenase isoform X2 [Apis mellifera]	22.85	49	13	13	Carbamidomethylation	222000000	234000000	233000000	237000000	252000000	232000000	105000000	117000000	0.897436	38592
XP_396930.1	cytochrome b5 isoform X1 [Apis mellifera]	20.83	74	5	5	Carbamidomethylation	350000000	341000000	332000000	390000000	369000000	382000000	333000000	371000000	0.897574	15783
XP_006560041.1	MICOS complex subunit Mic60 isoform X4 [Apis mellifera]	22.29	14	9	8		334000000	333000000	331000000	380000000	361000000	353000000	226000000	250000000	0.904	96459
XP_006564739.1	GIGYF family protein CG11148 isoform X2 [Apis mellifera]	24.91	3	4	4		28600000	27600000	27400000	25700000	24900000	25600000	25200000	22300000	1.13004	157387
XP_397116.4	nuclear pore complex protein Nup107 [Apis mellifera]	21.27	1	1	1		8410000	8880000	8630000	7700000	7480000	7630000	8640000	7610000	1.13535	107013
XP_391916.3	NADH dehydrogenase [ubiquinone] flavoprotein 1 mitochondrial [Apis mellifera]	22.56	18	4	4	Carbamidomethylation	35400000	43600000	44600000	52000000	49000000	54800000	36600000	31000000	1.18065	52698
XP_026301423.1	ATP synthase mitochondrial F1 complex assembly factor 1 [Apis mellifera]	24.36	6	1	1		7790000	8390000	7990000	6660000	6310000	6550000	8060000	6510000	1.2381	20678
XP_624816.1	histone chaperone asf1 [Apis mellifera]	25.98	13	2	2		36200000	33500000	32700000	30400000	32300000	29200000	27500000	22200000	1.23874	22411
XP_395827.2	39S ribosomal protein L15 mitochondrial [Apis mellifera]	20.54	3	1	1		13500000	13400000	13400000	10300000	9290000	10400000	13500000	9980000	1.35271	33681
XP_026295652.1	vitellogenin receptor [Apis mellifera]	27.89	22	26	26	Carbamidomethylation	964000000	1290000000	1050000000	1100000000	1030000000	1240000000	329000000	235000000	1.4	198333
XP_395729.3	dynactin subunit 2 [Apis mellifera]	32.14	36	11	11	Carbamidomethylation	1350000000	1460000000	1440000000	956000000	963000000	1030000000	1330000000	865000000	1.53757	46065
XP_393469.2	DNA replication licensing factor Mcm7 [Apis mellifera]	52.31	10	5	5	Carbamidomethylation	53400000	59900000	52300000	40800000	45700000	47100000	41600000	25800000	1.6124	82832
NP_001104234.1	hexamerin 70a precursor [Apis mellifera]	30.34	36	24	24		4670000000	5020000000	5020000000	2960000000	3130000000	3100000000	1540000000	939000000	1.64004	81460
XP_026300167.1	protein spindle-F isoform X3 [Apis mellifera]	23	3	1	1		18400000	19700000	20500000	12000000	11900000	11600000	19600000	11800000	1.66102	38277
XP_026297227.1	hemocyte protein-glutamine gamma-glutamyltransferase [Apis mellifera]	25.17	2	1	1		14100000	16600000	15600000	7720000	7050000	6760000	15400000	7180000	2.14485	80702
XP_026296331.1	NADH dehydrogenase [ubiquinone] iron-sulfur protein 5 isoform X1 [Apis mellifera]	33.41	11	1	1		25700000	28600000	29200000	7850000	10600000	12000000	27800000	10200000	2.72549	12579
XP_006562623.1	RNA-binding protein squid isoform X2 [Apis mellifera]	38.47	31	12	1	Carbamidomethylation	27400000	25800000	27400000	8990000	7830000	10600000	26900000	9140000	2.94311	37065
XP_006570686.2	protein PAT1 homolog 1 isoform X2 [Apis mellifera]	44.52	4	2	2		27900000	27100000	29500000	8820000	7380000	9450000	28200000	8550000	3.29825	84080
