# Supplementary material for: The molecular basis of socially induced egg-size plasticity in honey bees
Source: eLife. 2022 Nov 8;11:e80499. doi: 10.7554/eLife.80499 (PMC9747152; doi:10.7554/eLife.80499)
Supplement: Supplementary file 3. [file elife-80499-supp3.xlsx]

## Sheet: Sheet1
GOID	Ontology Source	GOTerm	GOLevels	GOGroups	Nr. Genes	% Associated Genes	Term PValue	Term PValue Corrected with Bonferroni step down	Group PValue	Group PValue Corrected with Bonferroni step down	Associated Genes Found	All Associated Genes	OverViewTerm
GO:0006446	GO_BiologicalProcess-GOA_07.10.2016_10h10	regulation of translational initiation	[4, 6, 7, 8, 9]	[Group00]	5	19.2308	0.000151112	0.0483557	{Group00=1.511115729267484E-4}	{Group00=1.511115729267484E-4}	[Adam, CG14207, Tango7, eIF3-S8, l(2)efl]	[Adam, CG10306, CG14207, CG14749, CG5642, DENR, Hsp67Bc, Int6, IntS6, MCTS1, Tango7, Thor, Trip1, aub, bol, eIF-3p66, eIF2B-alpha, eIF2B-beta, eIF2B-delta, eIF3-S10, eIF3-S8, eIF3-S9, eIF3ga, eIF3gb, l(2)efl, mxt]	TRUE
GO:0006605	GO_BiologicalProcess-GOA_07.10.2016_10h10	protein targeting	[5, 6, 7]	[Group09]	14	7.2165	3.92807e-05	0.0131198	{Group09=2.214507637424076E-5}	{Group09=1.1072538187120379E-4}	[Ank2, CG6512, Cam, Nup358, Nup50, Nup62, Nup98-96, Roe1, Srp68, Tim10, Tim13, Tim9a, lwr, wbl]	[128up, Act57B, Akt1, Ank, Ank2, Arl1, Arl5, Arr2, Atg4a, Atg4b, Atg6, Baldspot, CG10420, CG10688, CG11110, CG11753, CG11779, CG12379, CG12782, CG13426, CG1409, CG14712, CG14894, CG18472, CG32113, CG32164, CG32165, CG4520, CG5447, CG5662, CG5885, CG6512, CG6540, CG7214, CG7382, CG7791, CG8004, CG8206, CG8219, CG8531, CG8771, CG9240, CG9393, CaMKII, Cam, CanA-14F, CanB, Cas, Cul4, Diap2, Ebp, Fs(2…	FALSE
GO:0006810	GO_BiologicalProcess-GOA_07.10.2016_10h10	transport	[3]	[Group09]	65	3.25325	4.78319e-05	0.015928	{Group09=2.214507637424076E-5}	{Group09=1.1072538187120379E-4}	[AP-1-2beta, ATPsynCF6, ATPsynbeta, ATPsyndelta, Act5C, Ank2, AnxB9, Arp1, Arpc5, Atox1, CG10237, CG6512, CHOp24, CaBP1, Cam, Clc, Clic, Cp1, Inx2, Ku80, ND-MLRQ, Nacalpha, Npc2a, Nup358, Nup50, Nup62, Nup98-96, Pkc53E, Pzl, Rab1, Rac1, RanBP3, Rfabg, Rho1, Roe1, Sap-r, Snx3, Srp68, TER94, Tango7, Tim10, Tim13, Tim8, Tim9a, Tret1-2, U2af50, UQCR-C1, Vha26, Vha68-2, Vps20, Vps60, alpha-Spec, bic, …	[128up, ABCB7, AGO2, ALiX, AMPKalpha, AP-1-2beta, AP-1gamma, AP-1mu, AP-1sigma, AP-2alpha, AP-2mu, AP-2sigma, AQP, ATP6, ATP7, ATP8, ATP8B, ATPsynB, ATPsynC, ATPsynCF6, ATPsynCF6L, ATPsynD, ATPsynE, ATPsynF, ATPsynG, ATPsynGL, ATPsynO, ATPsynbeta, ATPsynbetaL, ATPsyndelta, ATPsynepsilonL, ATPsyngamma, Abi, Abl, Acsl, Act42A, Act57B, Act5C, Act88F, Adck, AdipoR, AdoR, Afti, Akt1, Amnionless, Amph,…	FALSE
GO:0006886	GO_BiologicalProcess-GOA_07.10.2016_10h10	intracellular protein transport	[4, 5, 6]	[Group09]	19	5.97484	2.44162e-05	0.0082771	{Group09=2.214507637424076E-5}	{Group09=1.1072538187120379E-4}	[AP-1-2beta, Ank2, CG6512, CHOp24, Cam, Clc, Nup358, Nup50, Nup62, Nup98-96, RanBP3, Roe1, Srp68, Tim10, Tim13, Tim9a, gammaCOP, lwr, wbl]	[128up, AP-1-2beta, AP-1gamma, AP-1mu, AP-1sigma, AP-2alpha, AP-2mu, AP-2sigma, Abl, Act57B, Akt1, Ank, Ank2, Apc, Arl1, Arl5, Arp3, Arpc1, Arr2, Atg4a, Atg4b, Atg6, Baldspot, CG10011, CG10144, CG10420, CG10688, CG11110, CG11753, CG11779, CG12241, CG12379, CG12782, CG13426, CG13887, CG1409, CG14712, CG14894, CG15161, CG1695, CG1724, CG18472, CG30441, CG32113, CG32164, CG32165, CG32506, CG32758, C…	FALSE
GO:0006996	GO_BiologicalProcess-GOA_07.10.2016_10h10	organelle organization	[3]	[Group08]	64	3.79372	4.01101e-07	0.000139984	{Group08=1.5977257895050108E-7}	{Group08=1.5977257895050108E-6}	[AP-1-2beta, Act5C, Ank2, Arp1, Arpc5, CG10939, CG5023, CG5903, CG6512, CG9008, Caf1-55, Cam, Clc, Cnot4, Cp1, Fim, Gbeta13F, HP1b, Jupiter, Ku80, Lon, Mitofilin, Nlp, Non2, Nup98-96, Ost48, Prosbeta7, Rab1, Rac1, Rad23, Rho1, Roe1, RpL5, RpS17, SelR, Snx3, Sod, TBPH, TER94, Tango7, Tcp-1zeta, Tim10, Tim13, Tim9a, Tm2, UQCR-C1, Vha68-2, Zasp52, alpha-Spec, chic, cib, crq, gammaCOP, l(2)efl, lap, …	[14-3-3epsilon, 14-3-3zeta, AGO2, ALiX, AP-1-2beta, AP-1gamma, AP-1mu, AP-1sigma, AP-2alpha, AP-2mu, AP-2sigma, APC10, APC4, APC7, ATP8B, Aats-his, Aats-tyr-m, Abi, Abl, Acf, Act42A, Act57B, Act5C, Act79B, Act87E, Act88F, Actn, Actn3, Ada2b, Adck, Amph, Ance, Ank, Ank2, Ankle2, Apc, Apc2, Arf51F, Arfip, Arfrp1, Arl1, Arl2, Arl6, Arp1, Arp10, Arp2, Arp3, Arp5, Arp53D, Arp8, Arpc1, Arpc2, Arpc3A, A…	FALSE
GO:0007007	GO_BiologicalProcess-GOA_07.10.2016_10h10	inner mitochondrial membrane organization	[5, 6]	[Group09]	5	62.5	1.73317e-07	6.1181e-05	{Group09=2.214507637424076E-5}	{Group09=1.1072538187120379E-4}	[CG5903, CG6512, Tim10, Tim13, Tim9a]	[CG5903, CG6512, Pmi, QIL1, Taz, Tim10, Tim13, Tim9a]	FALSE
GO:0007010	GO_BiologicalProcess-GOA_07.10.2016_10h10	cytoskeleton organization	[4]	[Group08]	33	5.25478	2.61393e-07	9.17489e-05	{Group08=1.5977257895050108E-7}	{Group08=1.5977257895050108E-6}	[Act5C, Ank2, Arp1, Arpc5, CG10939, CG5023, Cam, Cnot4, Cp1, Fim, Gbeta13F, Jupiter, Non2, Prosbeta7, Rab1, Rac1, Rho1, SelR, TBPH, TER94, Tcp-1zeta, Tm2, UQCR-C1, Zasp52, alpha-Spec, chic, cib, l(2)efl, lark, sqh, stai, tacc, up]	[14-3-3epsilon, 14-3-3zeta, ALiX, Abi, Abl, Act42A, Act57B, Act5C, Act79B, Act87E, Act88F, Actn, Actn3, Ank, Ank2, Apc, Apc2, Arf51F, Arfip, Arfrp1, Arl2, Arp1, Arp10, Arp2, Arp3, Arp53D, Arpc1, Arpc2, Arpc3A, Arpc3B, Arpc4, Arpc5, Atx2, BBS4, BRWD3, BicC, BicD, Brca2, Bsg, Bsg25D, Btk29A, BuGZ, Bug22, C3G, CAP, CCDC151, CG10092, CG10939, CG11298, CG11876, CG13127, CG13366, CG14131, CG14905, CG15…	TRUE
GO:0007015	GO_BiologicalProcess-GOA_07.10.2016_10h10	actin filament organization	[3, 5, 6]	[Group08]	12	7.27273	0.000130672	0.0422069	{Group08=1.5977257895050108E-7}	{Group08=1.5977257895050108E-6}	[Arpc5, Cp1, Fim, Gbeta13F, Rab1, Rac1, Rho1, SelR, alpha-Spec, chic, cib, up]	[ALiX, Abl, Act88F, Arfip, Arp2, Arp3, Arpc1, Arpc2, Arpc3A, Arpc3B, Arpc4, Arpc5, Atx2, Btk29A, CAP, CG1674, CG32082, CG32944, CG3618, CG6867, CG7497, Capa, Cdc42, Ced-12, Cip4, Cp1, CycT, DAAM, DCP1, Dcp-1, Dl, FER, Fhos, Fim, Fs(2)Ket, GMF, Gbeta13F, GckIII, Gel, Ggamma1, Girdin, Gprk1, HSPC300, Hakai, Hsp83, IKKepsilon, Khc, LamC, Lasp, Mhc, Mical, Mkk4, Msp300, Mtl, N, PI4KIIIalpha, PIP4K, P…	FALSE
GO:0007275	GO_BiologicalProcess-GOA_07.10.2016_10h10	multicellular organism development	[3]	[Group07]	91	2.95071	3.22086e-05	0.0107899	{Group07=5.816675580693571E-6}	{Group07=4.0716729064855E-5}	[AP-1-2beta, Act5C, Adam, Adk2, Ank2, AnxB9, Bin1, CG10939, CG3226, CG5214, CG7920, CG8891, CHOp24, CSN7, Caf1-55, Calr, Cam, Cp1, Cyp9f2, Es2, Fili, Fkbp14, Gbeta13F, GlyP, Hrb27C, Idgf4, Inx2, LSm7, Manf, Mdh2, Mitofilin, Nacalpha, Nopp140, Npc2a, Nup358, Nup50, Nup98-96, Ost48, Pka-R2, Ppn, Prosalpha6, Prosbeta7, Prx5, Rab1, Rac1, Rho1, Roe1, RpL23, RpS21, SelR, Snx3, Sod, TBPH, TER94, Tango7,…	[128up, 14-3-3epsilon, 14-3-3zeta, 140up, 18w, 4EHP, 5-HT2A, AGBE, AGO1, AGO2, AGO3, AMPKalpha, AP-1-2beta, AP-1gamma, AP-1mu, AP-1sigma, AP-2alpha, AP-2sigma, APC10, ATP7, ATPsynD, ATPsynbetaL, Aac11, Aatf, Aats-asp, Aats-gln, Aats-gly, Aats-met-m, Aats-thr, Aats-trp, Aats-val, Abd-B, Abi, Abl, Abp1, Ac76E, Acer, Acf, Ack, Ack-like, Acp65Aa, Acsl, Act57B, Act5C, Act79B, Actbeta, Actn, AdSS, Ada2…	TRUE
GO:0007308	GO_BiologicalProcess-GOA_07.10.2016_10h10	oocyte construction	[3, 4, 5, 6, 7, 8, 9, 10]	[Group03]	11	7.74648	0.000142776	0.0459739	{Group03=1.4277605246040053E-4}	{Group03=2.8555210492080106E-4}	[Cp1, Hrb27C, TER94, Tm2, alpha-Spec, bic, chic, ea, rump, sel, wbl]	[14-3-3epsilon, 14-3-3zeta, BicD, CSN5, Chc, CkIIalpha, CkIIbeta, Cp1, DCP1, Dcp-1, Dg, Dhc64C, Dl, Egfr, Ets97D, Fmr1, Gprk1, Grip128, Grip71, Grip75, Hrb27C, Hsp83, IKKepsilon, Khc, Lasp, Lcp65Ad, Lis-1, Lkb1, Mer, Moe, N, Nos, Pat1, Pka-C1, Pka-R1, Rab11, Rab6, Ras85D, Rbsn-5, Rok, Rop, Scox, SmD3, Sry-delta, Syp, Syt1, Syx1A, TBCB, TER94, Tm1, Tm2, Vps25, Vps36, aPKC, alpha-Spec, armi, aub, b…	TRUE
GO:0008104	GO_BiologicalProcess-GOA_07.10.2016_10h10	protein localization	[3]	[Group09]	35	5.31915	1.2635e-07	4.47277e-05	{Group09=2.214507637424076E-5}	{Group09=1.1072538187120379E-4}	[AP-1-2beta, Act5C, Ank2, AnxB9, CG6512, CHOp24, Cam, Clc, Gbeta13F, Nacalpha, Nup358, Nup50, Nup62, Nup98-96, Rab1, RanBP3, Rho1, Roe1, Snx3, Srp68, Tango7, Tim10, Tim13, Tim8, Tim9a, Vha26, Vps60, bic, chic, gammaCOP, lark, lwr, sel, tacc, wbl]	[128up, ACC, AP-1-2beta, AP-1gamma, AP-1mu, AP-1sigma, AP-2alpha, AP-2mu, AP-2sigma, ATP8B, Abl, Ack, Act57B, Act5C, Actn, AdipoR, Afti, Akt1, Amnionless, Amph, Ank, Ank2, AnxB9, Apc, Arf102F, Arf51F, Arf79F, Arl1, Arl5, Arp3, Arpc1, Arr2, Atg18a, Atg18b, Atg3, Atg4a, Atg4b, Atg5, Atg6, Atg9, BBS1, Baldspot, Bili, CCDC53, CG10011, CG10103, CG10144, CG10420, CG10688, CG11110, CG11753, CG11779, CG1…	TRUE
GO:0009141	GO_BiologicalProcess-GOA_07.10.2016_10h10	nucleoside triphosphate metabolic process	[5, 6, 7]	[Group05]	12	8.57143	2.62998e-05	0.00888932	{Group05=2.62997640526956E-5}	{Group05=1.051990562107824E-4}	[ATPsynCF6, ATPsynbeta, ATPsyndelta, Adk2, CG8891, Hex-A, ND-ACP, Pgk, UQCR-C1, Vha68-2, dUTPase, scu]	[AIF, ATP6, ATP8, ATPsynB, ATPsynC, ATPsynCF6, ATPsynCF6L, ATPsynD, ATPsynE, ATPsynF, ATPsynG, ATPsynGL, ATPsynO, ATPsynbeta, ATPsynbetaL, ATPsyndelta, ATPsynepsilonL, ATPsyngamma, Adk1, Adk2, Adk3, Ald, CG11249, CG12229, CG12895, CG14757, CG1544, CG15547, CG15812, CG15896, CG17300, CG17726, CG2964, CG32649, CG32650, CG3326, CG5757, CG6255, CG6364, CG6629, CG7059, CG7069, CG7362, CG7813, CG8891, …	TRUE
GO:0016485	GO_BiologicalProcess-GOA_07.10.2016_10h10	protein processing	[5, 6]	[Group01]	9	12.1622	1.71482e-05	0.00583037	{Group01=1.71481519996985E-5}	{Group01=1.0288891199819099E-4}	[CG3107, CG6512, Rho1, Spn42Da, Tango7, UQCR-C1, ea, sel, wbl]	[Atg4a, Atg4b, CG10588, CG11110, CG3107, CG3589, CG4678, CG5991, CG6512, CG7573, CG7791, CG9240, CalpA, CalpB, Det, Diap1, Diap2, Dredd, Drice, Dronc, Fur1, Fur2, Ide, Mmp2, Nep3, Psn, Rho1, S1P, S2P, SCAP, SPE, Semp1, Sems, Spase12, Spase22-23, Spase25, Spn42Da, Spp, SppL, Sras, Tango7, Tasp1, UQCR-C1, UQCR-C2, amon, aph-1, cer, ea, gd, hh, hpo, l(2)gd1, nct, ndl, pip, pps, psq, rho, rho-4, rho-…	TRUE
GO:0017038	GO_BiologicalProcess-GOA_07.10.2016_10h10	protein import	[4, 5, 6]	[Group09]	11	8.66142	5.19411e-05	0.0170886	{Group09=2.214507637424076E-5}	{Group09=1.1072538187120379E-4}	[CG6512, Cam, Nup358, Nup50, Nup62, Nup98-96, Roe1, Tim10, Tim13, Tim9a, lwr]	[Act57B, Akt1, Baldspot, CG11779, CG12379, CG12782, CG1409, CG14712, CG32164, CG32165, CG4520, CG6512, CG6540, CG7214, CG7382, CG8206, CG8219, CG8531, CG8771, CaMKII, Cam, CanA-14F, CanB, Cas, Cul4, Diap2, Ebp, Fbp1, Fs(2)Ket, Gp210, Grip, Hop, Kap-alpha1, Kap-alpha3, Karybeta3, Mtor, Nup107, Nup133, Nup153, Nup154, Nup160, Nup205, Nup214, Nup358, Nup44A, Nup50, Nup54, Nup58, Nup62, Nup75, Nup93-…	FALSE
GO:0019725	GO_BiologicalProcess-GOA_07.10.2016_10h10	cellular homeostasis	[3, 4]	[Group04]	18	7.89474	8.35497e-07	0.000289917	{Group04=2.890263634477102E-5}	{Group04=8.670790903431307E-5}	[Ank2, Atox1, CaBP1, Cam, ERp60, Fkbp14, Hex-A, Letm1, Manf, Nup358, Pgk, Prx5, Prx6005, TER94, Trx-2, Trxr-1, Vha68-2, up]	[ABCB7, AIF, ATP7, Ank2, Atox1, Atpalpha, Best1, BthD, CCKLR-17D1, CG10470, CG10700, CG1090, CG11007, CG11148, CG11619, CG12061, CG12206, CG12896, CG13473, CG14221, CG14407, CG17680, CG17843, CG18130, CG18132, CG18135, CG1840, CG2818, CG31413, CG31559, CG32000, CG32554, CG32557, CG3719, CG4199, CG43321, CG4495, CG4500, CG4670, CG5002, CG5027, CG5398, CG5404, CG5554, CG6125, CG6523, CG6690, CG6852…	TRUE
GO:0030029	GO_BiologicalProcess-GOA_07.10.2016_10h10	actin filament-based process	[3]	[Group08]	21	7.07071	6.18865e-07	0.000215365	{Group08=1.5977257895050108E-7}	{Group08=1.5977257895050108E-6}	[Arpc5, CG10939, CG5023, Cam, Cp1, Fim, Gbeta13F, Mlc-c, Rab1, Rac1, Rho1, SelR, Tm2, Zasp52, alpha-Spec, chic, cib, l(2)efl, lark, sqh, up]	[ALiX, Abi, Abl, Acam, Act88F, Actn, Actn3, Apc2, Arf51F, Arfip, Arp2, Arp3, Arpc1, Arpc2, Arpc3A, Arpc3B, Arpc4, Arpc5, Atx2, BicC, Bsg, Btk29A, C3G, CAP, CG10939, CG13366, CG14131, CG1674, CG32082, CG32138, CG32264, CG32944, CG34347, CG3618, CG5023, CG6867, CG7497, CaMKII, Cam, CanB2, Capa, Cdc42, Ced-12, Cip4, Cp1, Crk, CycT, DAAM, DCP1, Dcp-1, Det, Dg, Dl, FER, Fhos, Fim, Fs(2)Ket, GMF, Galph…	FALSE
GO:0030036	GO_BiologicalProcess-GOA_07.10.2016_10h10	actin cytoskeleton organization	[4, 5]	[Group08]	19	6.73759	4.42062e-06	0.00151185	{Group08=1.5977257895050108E-7}	{Group08=1.5977257895050108E-6}	[Arpc5, CG10939, CG5023, Cp1, Fim, Gbeta13F, Rab1, Rac1, Rho1, SelR, Tm2, Zasp52, alpha-Spec, chic, cib, l(2)efl, lark, sqh, up]	[ALiX, Abi, Abl, Act88F, Actn, Actn3, Apc2, Arf51F, Arfip, Arp2, Arp3, Arpc1, Arpc2, Arpc3A, Arpc3B, Arpc4, Arpc5, Atx2, BicC, Bsg, Btk29A, C3G, CAP, CG10939, CG13366, CG14131, CG1674, CG32082, CG32138, CG32264, CG32944, CG34347, CG3618, CG5023, CG6867, CG7497, CanB2, Capa, Cdc42, Ced-12, Cip4, Cp1, Crk, CycT, DAAM, DCP1, Dcp-1, Det, Dg, Dl, FER, Fhos, Fim, Fs(2)Ket, GMF, Galphai, Galphao, Gbeta1…	FALSE
GO:0030154	GO_BiologicalProcess-GOA_07.10.2016_10h10	cell differentiation	[4]	[Group07]	74	3.11186	5.12511e-05	0.0169129	{Group07=5.816675580693571E-6}	{Group07=4.0716729064855E-5}	[AP-1-2beta, ATPsynbeta, Act5C, Adam, Adk2, Ank2, CG5214, CG6512, CG7920, CG8891, CSN7, Caf1-55, Calr, Cam, Cp1, Cyt-b5, GCS2beta, Gbeta13F, Hrb27C, Inx2, LSm7, Manf, Mdh2, Mitofilin, Mp20, Nacalpha, Nopp140, Npc2a, Nup50, Ost48, Pgk, Pka-R2, Prosbeta7, Rab1, Rac1, Rho1, Roe1, RpL23, SelR, TBPH, TER94, Tango7, Tm2, Trxr-1, U2af50, Ubc10, Vps20, Vps60, Zasp52, alpha-Spec, bic, cathD, chic, crq, eI…	[128up, 14-3-3epsilon, 14-3-3zeta, 18w, 4EHP, AGO1, AGO2, AIF, ALiX, AMPKalpha, AP-1-2beta, AP-1sigma, AP-2alpha, AP-2mu, AP-2sigma, APC10, ATPsynF, ATPsynbeta, ATPsynbetaL, Aac11, Aatf, Aats-asp, Aats-gln, Aats-gly, Aats-met-m, Aats-thr, Aats-trp, Aats-val, Abd-B, Abi, Abl, Acf, Ack, Ack-like, Acsl, Act57B, Act5C, Act79B, Act88F, Actbeta, Actn, AdSS, Ada2b, Adam, Adgf-A, Adgf-A2, Adk2, AdoR, Aft…	FALSE
GO:0034613	GO_BiologicalProcess-GOA_07.10.2016_10h10	cellular protein localization	[4]	[Group09]	22	4.89978	0.000112878	0.0366853	{Group09=2.214507637424076E-5}	{Group09=1.1072538187120379E-4}	[AP-1-2beta, Act5C, Ank2, CG6512, CHOp24, Cam, Clc, Nup358, Nup50, Nup62, Nup98-96, RanBP3, Rho1, Roe1, Srp68, Tim10, Tim13, Tim9a, chic, gammaCOP, lwr, wbl]	[128up, ACC, AP-1-2beta, AP-1gamma, AP-1mu, AP-1sigma, AP-2alpha, AP-2mu, AP-2sigma, Abl, Ack, Act57B, Act5C, Actn, Akt1, Ank, Ank2, Apc, Arl1, Arl5, Arp3, Arpc1, Arr2, Atg18a, Atg18b, Atg4a, Atg4b, Atg6, Atg9, BBS1, Baldspot, CG10011, CG10144, CG10420, CG10688, CG11110, CG11753, CG11779, CG11975, CG12241, CG12379, CG12782, CG13426, CG13887, CG1409, CG14712, CG14894, CG14977, CG15161, CG1598, CG1…	FALSE
GO:0042592	GO_BiologicalProcess-GOA_07.10.2016_10h10	homeostatic process	[3]	[Group04]	23	5.22727	2.89026e-05	0.00974019	{Group04=2.890263634477102E-5}	{Group04=8.670790903431307E-5}	[Ank2, Atox1, CaBP1, Cam, ERp60, Fkbp14, Hex-A, Ku80, Letm1, Manf, Npc2a, Nup358, Pgk, Prx5, Prx6005, Rab1, Rho1, TER94, Trx-2, Trxr-1, Vha68-2, up, wal]	[ABCB7, AIF, ATP7, Aats-val, Acox57D-d, Acox57D-p, Adck, AdipoR, Akh, AkhR, Ank2, Aps, Arc42, Arr1, Arr2, Atac2, Atf3, Atox1, Atpalpha, Atx-1, Best1, BthD, Burs, CCKLR-17D1, CDase, CG10470, CG10700, CG1090, CG11007, CG11077, CG11148, CG11619, CG11825, CG12061, CG12206, CG12262, CG12896, CG13473, CG14184, CG14221, CG14407, CG14757, CG17352, CG17680, CG17843, CG18130, CG18132, CG18135, CG1840, CG28…	FALSE
GO:0044765	GO_BiologicalProcess-GOA_07.10.2016_10h10	single-organism transport	[3, 4]	[Group09]	47	4.14828	1.72942e-06	0.000598381	{Group09=2.214507637424076E-5}	{Group09=1.1072538187120379E-4}	[AP-1-2beta, ATPsynCF6, ATPsynbeta, ATPsyndelta, Act5C, Ank2, Arp1, Arpc5, CG6512, CHOp24, CaBP1, Cam, Clc, Cp1, ND-MLRQ, Npc2a, Nup358, Nup50, Nup62, Nup98-96, Rab1, Rac1, Rfabg, Roe1, Sap-r, Snx3, Srp68, Tango7, Tim10, Tim13, Tim9a, Tret1-2, UQCR-C1, Vha26, Vha68-2, alpha-Spec, chic, crq, eater, gammaCOP, lap, lark, lwr, sel, sqh, stai, wbl]	[128up, AGO2, ALiX, AMPKalpha, AP-1-2beta, AP-1gamma, AP-1mu, AP-1sigma, AP-2alpha, AP-2mu, AP-2sigma, AQP, ATP6, ATP8, ATP8B, ATPsynB, ATPsynC, ATPsynCF6, ATPsynCF6L, ATPsynD, ATPsynE, ATPsynF, ATPsynG, ATPsynGL, ATPsynO, ATPsynbeta, ATPsynbetaL, ATPsyndelta, ATPsynepsilonL, ATPsyngamma, Abi, Abl, Act42A, Act57B, Act5C, Act88F, Adck, AdipoR, Akt1, Amph, Ank, Ank2, Aplip1, Apoltp, Arf102F, Arf51F…	FALSE
GO:0045184	GO_BiologicalProcess-GOA_07.10.2016_10h10	establishment of protein localization	[3, 4]	[Group09]	28	5.87002	3.71971e-07	0.00013019	{Group09=2.214507637424076E-5}	{Group09=1.1072538187120379E-4}	[AP-1-2beta, Ank2, CG6512, CHOp24, Cam, Clc, Nacalpha, Nup358, Nup50, Nup62, Nup98-96, Rab1, RanBP3, Rho1, Roe1, Snx3, Srp68, Tango7, Tim10, Tim13, Tim8, Tim9a, Vps60, bic, gammaCOP, lwr, sel, wbl]	[128up, AP-1-2beta, AP-1gamma, AP-1mu, AP-1sigma, AP-2alpha, AP-2mu, AP-2sigma, Abl, Act57B, AdipoR, Afti, Akt1, Amnionless, Ank, Ank2, Apc, Arf102F, Arf51F, Arf79F, Arl1, Arl5, Arp3, Arpc1, Arr2, Atg3, Atg4a, Atg4b, Atg5, Atg6, Baldspot, Bili, CCDC53, CG10011, CG10103, CG10144, CG10420, CG10688, CG11110, CG11753, CG11779, CG12241, CG12379, CG12782, CG13426, CG13887, CG1409, CG14712, CG14749, CG1…	FALSE
GO:0046034	GO_BiologicalProcess-GOA_07.10.2016_10h10	ATP metabolic process	[7, 8, 9, 10]	[Group05]	10	8.40336	0.000146735	0.0471018	{Group05=2.62997640526956E-5}	{Group05=1.051990562107824E-4}	[ATPsynCF6, ATPsynbeta, ATPsyndelta, Adk2, Hex-A, ND-ACP, Pgk, UQCR-C1, Vha68-2, scu]	[AIF, ATP6, ATP8, ATPsynB, ATPsynC, ATPsynCF6, ATPsynCF6L, ATPsynD, ATPsynE, ATPsynF, ATPsynG, ATPsynGL, ATPsynO, ATPsynbeta, ATPsynbetaL, ATPsyndelta, ATPsynepsilonL, ATPsyngamma, Adk1, Adk2, Ald, CG11249, CG12229, CG12895, CG14757, CG1544, CG15812, CG15896, CG17300, CG17726, CG2964, CG32649, CG32650, CG3326, CG6629, CG7059, CG7069, CG7362, CG7813, CG9010, CG9791, CG9961, CIA30, CLS, COX1, COX4,…	FALSE
GO:0046907	GO_BiologicalProcess-GOA_07.10.2016_10h10	intracellular transport	[3, 4]	[Group09]	28	5.41586	1.85501e-06	0.000639979	{Group09=2.214507637424076E-5}	{Group09=1.1072538187120379E-4}	[AP-1-2beta, Ank2, Arp1, Atox1, CG6512, CHOp24, Cam, Clc, Cp1, Npc2a, Nup358, Nup50, Nup62, Nup98-96, Rab1, RanBP3, Roe1, Srp68, Tim10, Tim13, Tim9a, U2af50, gammaCOP, lark, lwr, sqh, stai, wbl]	[128up, AP-1-2beta, AP-1gamma, AP-1mu, AP-1sigma, AP-2alpha, AP-2mu, AP-2sigma, ATPsynO, Abl, Acsl, Act57B, Afti, Akt1, Ank, Ank2, Apc, Aplip1, Arfrp1, Arl1, Arl5, Arl6, Arp1, Arp3, Arpc1, Arr2, Atg1, Atg4a, Atg4b, Atg6, Atox1, Baldspot, Bet1, Bet3, Bet5, Blos4, CG10011, CG10144, CG10420, CG10466, CG10688, CG11110, CG11151, CG1116, CG11753, CG11779, CG12241, CG12269, CG12379, CG12782, CG13137, CG…	FALSE
GO:0048731	GO_BiologicalProcess-GOA_07.10.2016_10h10	system development	[3, 4]	[Group07]	74	3.04778	0.000114846	0.03721	{Group07=5.816675580693571E-6}	{Group07=4.0716729064855E-5}	[AP-1-2beta, Act5C, Adam, Adk2, Ank2, AnxB9, CG10939, CG3226, CG5214, CG7920, CG8891, CHOp24, Caf1-55, Calr, Cam, Cp1, Cyp9f2, Es2, Fili, Fkbp14, Gbeta13F, Hrb27C, Idgf4, Inx2, LSm7, Manf, Mdh2, Mitofilin, Nacalpha, Nopp140, Npc2a, Nup358, Nup50, Nup98-96, Ost48, Pka-R2, Ppn, Prosbeta7, Rab1, Rac1, Rho1, Roe1, RpL23, RpS21, SelR, Snx3, TBPH, TER94, Tango7, Tm2, Trxr-1, U2af50, Ubc10, Vha26, Vha68…	[128up, 14-3-3epsilon, 14-3-3zeta, 18w, 4EHP, AGO1, AGO2, AMPKalpha, AP-1-2beta, AP-1gamma, AP-1mu, AP-1sigma, AP-2alpha, AP-2sigma, APC10, Aac11, Aatf, Aats-asp, Aats-gln, Aats-gly, Aats-met-m, Aats-thr, Aats-trp, Aats-val, Abd-B, Abi, Abl, Abp1, Acer, Acf, Ack-like, Acsl, Act57B, Act5C, Act79B, Actbeta, AdSS, Ada2b, Adam, AdamTS-A, Adgf-A, Adk2, AdoR, Afti, Akap200, Akt1, Alh, Alk, Amph, Amun, …	FALSE
GO:0048869	GO_BiologicalProcess-GOA_07.10.2016_10h10	cellular developmental process	[3]	[Group07]	76	3.05712	6.90881e-05	0.0226609	{Group07=5.816675580693571E-6}	{Group07=4.0716729064855E-5}	[AP-1-2beta, ATPsynbeta, Act5C, Adam, Adk2, Ank2, Arpc5, CG5214, CG6512, CG7920, CG8891, CSN7, Caf1-55, Calr, Cam, Cp1, Cyt-b5, GCS2beta, Gbeta13F, Hrb27C, Inx2, LSm7, Manf, Mdh2, Mitofilin, Mp20, Nacalpha, Nopp140, Npc2a, Nup50, Ost48, Pgk, Pka-R2, Prosbeta7, Rab1, Rac1, Rho1, Roe1, RpL23, SelR, TBPH, TER94, Tango7, Tm2, Trxr-1, U2af50, Ubc10, Vps20, Vps60, Zasp52, alpha-Spec, bic, cathD, chic, …	[128up, 14-3-3epsilon, 14-3-3zeta, 18w, 4EHP, ACC, AGO1, AGO2, AIF, ALiX, AMPKalpha, AP-1-2beta, AP-1sigma, AP-2alpha, AP-2mu, AP-2sigma, APC10, ATPsynF, ATPsynbeta, ATPsynbetaL, Aac11, Aatf, Aats-asp, Aats-gln, Aats-gly, Aats-met-m, Aats-thr, Aats-trp, Aats-val, Abd-B, Abi, Abl, Acf, Ack, Ack-like, Acsl, Act57B, Act5C, Act79B, Act88F, Actbeta, Actn, AdSS, Ada2b, Adam, Adgf-A, Adgf-A2, Adk2, AdoR…	FALSE
GO:0051050	GO_BiologicalProcess-GOA_07.10.2016_10h10	positive regulation of transport	[2, 3, 4, 5]	[Group06]	11	9.16667	3.06777e-05	0.0103077	{Group06=2.402351923012072E-6}	{Group06=1.9218815384096577E-5}	[CHOp24, CaBP1, Cam, Pkc53E, Rab1, RanBP3, Snx3, U2af50, Vps60, eater, lap]	[AP-2alpha, Abl, Act57B, Adck, AdipoR, Apoltp, Arf79F, BicD, CASK, CG17597, CG31935, CG7214, CHOp24, CaBP1, CaMKII, Cad99C, Cadps, Cam, CanA-14F, CanB, CapaR, Cas, Cdk12, Chc, Cortactin, Crag, Cul4, DCTN2-p50, Diap2, Fife, Fs(2)Ket, Glut1, Hip14, Itp-r83A, Kap-alpha3, Klp61F, LpR2, Moe, Mtor, Mvl, Myc, Nedd4, Nrx-1, PIG-V, Pkc53E, Pkc98E, Pld, Ppt1, RIOK1, RIOK2, Rab1, Rab11, Rab27, RanBP3, RhoGA…	TRUE
GO:0051130	GO_BiologicalProcess-GOA_07.10.2016_10h10	positive regulation of cellular component organization	[3, 4, 5]	[Group06]	16	6.4	4.80786e-05	0.0159621	{Group06=2.402351923012072E-6}	{Group06=1.9218815384096577E-5}	[Ank2, Arpc5, CaBP1, Jupiter, Pkc53E, Rab1, Rac1, Rpt3, Rpt5, TBPH, Tm2, Vps60, chic, eater, lap, nudC]	[AP-2alpha, APC7, Abi, Abl, Abp1, Ada2a, Ada2b, Ada3, Akt1, Ank2, Apc, Arf79F, Arfip, Arp2, Arp3, Arpc1, Arpc2, Arpc3A, Arpc3B, Arpc4, Arpc5, Atac2, Atf-2, Atxn7, Bap60, BicD, Bsg25A, Bub1, BubR1, CASK, CG11486, CG14806, CG1674, CG30382, CG31935, CG32082, CG34362, CG42261, CG6353, CG9791, CaBP1, Cad99C, Ccdc56, Cdc16, Cdc23, Cdc42, Chc, Cip4, CoRest, Cortactin, Cp190, Crag, DAAM, Dhc64C, Drp1, El…	FALSE
GO:0051493	GO_BiologicalProcess-GOA_07.10.2016_10h10	regulation of cytoskeleton organization	[5, 6]	[Group08]	11	8.27068	7.92369e-05	0.0258312	{Group08=1.5977257895050108E-7}	{Group08=1.5977257895050108E-6}	[Arpc5, Gbeta13F, Jupiter, Rho1, TBPH, Tm2, alpha-Spec, chic, sqh, stai, tacc]	[Abi, Abl, Apc, Apc2, Arfip, Arp2, Arp3, Arpc1, Arpc2, Arpc3A, Arpc3B, Arpc4, Arpc5, Atx2, Btk29A, CG10092, CG11298, CG15923, CG1674, CG17003, CG17816, CG32082, CG3967, CG6867, Cdc42, Cep135, Cep97, Cip4, Cp110, Cp190, Crk, DAAM, Dhc64C, Fhos, GMF, Gbeta13F, Gel, Ggamma1, Gprk1, HSPC300, IKKepsilon, Jupiter, LamC, Lrrk, Moe, Mtor, Ocrl, Patronin, PsGEF, Pvr, Rho1, RhoGAP68F, RhoGAP92B, RhoGEF2, R…	FALSE
GO:0051649	GO_BiologicalProcess-GOA_07.10.2016_10h10	establishment of localization in cell	[3]	[Group09]	31	4.32961	5.11632e-05	0.016935	{Group09=2.214507637424076E-5}	{Group09=1.1072538187120379E-4}	[AP-1-2beta, Ank2, Arp1, Atox1, CG6512, CHOp24, Cam, Clc, Cp1, Npc2a, Nup358, Nup50, Nup62, Nup98-96, Rab1, RanBP3, Roe1, Srp68, Tim10, Tim13, Tim9a, U2af50, gammaCOP, lap, lark, lwr, nudC, sqh, stai, tacc, wbl]	[128up, AGO2, AP-1-2beta, AP-1gamma, AP-1mu, AP-1sigma, AP-2alpha, AP-2mu, AP-2sigma, ATPsynO, Abl, Acsl, Act57B, Afti, Akt1, Amph, Ank, Ank2, Apc, Apc2, Aplip1, Arf102F, Arf51F, Arf79F, Arfrp1, Arl1, Arl2, Arl5, Arl6, Arp1, Arp3, Arpc1, Arr2, Atg1, Atg4a, Atg4b, Atg6, Atox1, Baldspot, Bet1, Bet3, Bet5, BicD, Blos1, Blos4, CASK, CDase, CG10011, CG10144, CG10420, CG10466, CG10688, CG11110, CG11151…	FALSE
GO:0055114	GO_BiologicalProcess-GOA_07.10.2016_10h10	oxidation-reduction process	[3]	[Group02]	37	5.06849	1.7859e-07	6.28638e-05	{Group02=1.7859027561272032E-7}	{Group02=1.607312480514483E-6}	[Adi1, Aldh, CG14997, CG17896, CG31075, CG31548, CG3609, CG3902, CG5214, CG6084, CG7460, CG9150, CREG, Coprox, Cyp6a14, Cyp9f2, Cyt-b5, GlyP, GstS1, Mdh2, ND-30, ND-ACP, ND-B17, ND-MLRQ, PHGPx, PPO2, Prx5, Prx6005, Sc2, SelR, Sod, Sod3, Trx-2, Trxr-1, UQCR-C1, scu, wal]	[ACC, AGBE, AIF, AOX1, AOX2, AOX3, AOX4, ARY, Acon, Acox57D-d, Acox57D-p, Adh, Adhr, Adi1, AdipoR, Aldh, Aldh-III, AlkB, Alr, Arc42, Asph, Atg1, CG10096, CG10097, CG10131, CG10165, CG10211, CG10253, CG10337, CG10425, CG10463, CG10495, CG10512, CG10561, CG10638, CG10639, CG10672, CG10700, CG10721, CG10748, CG10749, CG10814, CG10863, CG10932, CG11151, CG11162, CG11200, CG11208, CG11236, CG11257, CG…	TRUE
GO:0070727	GO_BiologicalProcess-GOA_07.10.2016_10h10	cellular macromolecule localization	[3]	[Group09]	28	5.26316	3.23131e-06	0.00110834	{Group09=2.214507637424076E-5}	{Group09=1.1072538187120379E-4}	[AP-1-2beta, Act5C, Ank2, CG6512, CHOp24, Cam, Clc, Cp1, Hrb27C, Nup358, Nup50, Nup62, Nup98-96, RanBP3, Rho1, Roe1, Srp68, TER94, Tim10, Tim13, Tim9a, Tm2, bic, chic, gammaCOP, lwr, rump, wbl]	[128up, ACC, AP-1-2beta, AP-1gamma, AP-1mu, AP-1sigma, AP-2alpha, AP-2mu, AP-2sigma, Abl, Ack, Act57B, Act5C, Act79B, Actn, Akt1, Ank, Ank2, Apc, Arl1, Arl5, Arp3, Arpc1, Arr2, Atg18a, Atg18b, Atg4a, Atg4b, Atg6, Atg9, BBS1, Baldspot, BicD, CDC45L, CG10011, CG10144, CG10420, CG10688, CG11110, CG11753, CG11779, CG11975, CG12241, CG12379, CG12782, CG13426, CG13887, CG1409, CG14712, CG14894, CG14977…	FALSE
GO:0072594	GO_BiologicalProcess-GOA_07.10.2016_10h10	establishment of protein localization to organelle	[4, 5, 6]	[Group09]	13	7.26257	6.96296e-05	0.0227689	{Group09=2.214507637424076E-5}	{Group09=1.1072538187120379E-4}	[CG6512, Cam, Nup358, Nup50, Nup62, Nup98-96, Roe1, Srp68, Tim10, Tim13, Tim9a, lwr, wbl]	[128up, Act57B, Akt1, Arl1, Arl5, Arr2, Atg6, Baldspot, CG10420, CG10688, CG11110, CG11753, CG11779, CG12379, CG12782, CG1409, CG14712, CG14894, CG18472, CG31935, CG32113, CG32164, CG32165, CG4520, CG5662, CG5885, CG6512, CG6540, CG7214, CG7382, CG7791, CG8004, CG8206, CG8219, CG8531, CG8771, CG9240, CG9393, CaMKII, Cam, CanA-14F, CanB, Cas, Cul4, Diap2, Ebp, Fs(2)Ket, GCC185, GCC88, Gmap, Golgin…	FALSE
GO:1902582	GO_BiologicalProcess-GOA_07.10.2016_10h10	single-organism intracellular transport	[4, 5]	[Group09]	17	7.05394	7.83092e-06	0.00267034	{Group09=2.214507637424076E-5}	{Group09=1.1072538187120379E-4}	[Ank2, Arp1, CG6512, Cam, Npc2a, Nup358, Nup50, Nup62, Nup98-96, Rab1, Roe1, Srp68, Tim10, Tim13, Tim9a, lwr, stai]	[128up, ATPsynO, Act57B, Akt1, Ank, Ank2, Aplip1, Arfrp1, Arp1, Atg1, Atg4a, Atg4b, Baldspot, CG10420, CG11151, CG11779, CG12269, CG12379, CG12782, CG1409, CG14712, CG15161, CG17597, CG30441, CG32164, CG32165, CG32442, CG42837, CG4520, CG5142, CG5447, CG5780, CG5885, CG6512, CG6540, CG7214, CG7382, CG8206, CG8219, CG8531, CG8771, CG9279, COX5B, COX5BL, CaMKII, Cam, CanA-14F, CanB, Cas, Cby, Che-1…	FALSE
GO:1902589	GO_BiologicalProcess-GOA_07.10.2016_10h10	single-organism organelle organization	[3, 4]	[Group08]	39	4.47761	2.05363e-06	0.00070645	{Group08=1.5977257895050108E-7}	{Group08=1.5977257895050108E-6}	[Ank2, Arpc5, CG10939, CG5023, CG5903, CG6512, Cam, Cnot4, Cp1, Fim, Gbeta13F, Jupiter, Mitofilin, Non2, Prosbeta7, Rab1, Rac1, Rho1, SelR, Sod, TBPH, TER94, Tcp-1zeta, Tim10, Tim13, Tim9a, Tm2, UQCR-C1, Zasp52, alpha-Spec, chic, cib, l(2)efl, lark, scu, sqh, stai, tacc, up]	[14-3-3epsilon, 14-3-3zeta, AGO2, ALiX, APC10, APC4, APC7, Abi, Abl, Act57B, Act88F, Actn, Actn3, Ank, Ank2, Apc, Apc2, Arf51F, Arfip, Arl2, Arl6, Arp2, Arp3, Arpc1, Arpc2, Arpc3A, Arpc3B, Arpc4, Arpc5, Atg12, Atg17, Atg18a, Atg18b, Atg2, Atg3, Atg4a, Atg4b, Atg5, Atg7, Atg8a, Atg8b, Atg9, Atx2, B9d1, BBS1, BBS4, BBS8, BicC, BicD, Brca2, Bsg, Bsg25D, Btk29A, BuGZ, Bub1, Bub3, BubR1, Bug22, C3G, C…	FALSE
