# Supplementary material for: The molecular basis of socially induced egg-size plasticity in honey bees
Source: eLife. 2022 Nov 8;11:e80499. doi: 10.7554/eLife.80499 (PMC9747152; doi:10.7554/eLife.80499)
Supplement: Supplementary file 4. [file elife-80499-supp4.xlsx]

## Sheet: Sheet1
GroupID	Category	Term	Description	LogP	Log(q-value)	InTerm_InList	Genes	Symbols
1_Summary	KEGG Pathway	dme00010	Glycolysis / Gluconeogenesis	-4.7841	-2.55739	8/54	31406,33461,34021,34256,34779,35923,43244,45875,31605,40299,42185	Pdha,Pgk,muc,Aldh,CG9008,Pgm2a,CG31075,Hex-A,Fum1,tzn,Mdh2
1_Member	KEGG Pathway	dme00010	Glycolysis / Gluconeogenesis	-4.7841	-2.55739	8/54	31406,33461,34021,34256,34779,35923,43244,45875	Pdha,Pgk,muc,Aldh,CG9008,Pgm2a,CG31075,Hex-A
1_Member	KEGG Pathway	ko00010	Glycolysis / Gluconeogenesis	-4.7841	-2.55739	8/54	31406,33461,34021,34256,34779,35923,43244,45875	Pdha,Pgk,muc,Aldh,CG9008,Pgm2a,CG31075,Hex-A
1_Member	KEGG Pathway	dme00620	Pyruvate metabolism	-4.32787	-2.53665	7/46	31406,31605,34021,34256,40299,42185,43244	Pdha,Fum1,muc,Aldh,tzn,Mdh2,CG31075
1_Member	KEGG Pathway	ko00620	Pyruvate metabolism	-4.32787	-2.53665	7/46	31406,31605,34021,34256,40299,42185,43244	Pdha,Fum1,muc,Aldh,tzn,Mdh2,CG31075
2_Summary	KEGG Pathway	dme00020	Citrate cycle (TCA cycle)	-4.5247	-2.55739	7/43	31406,31605,34021,38447,41360,42185,44149,30995,33461,45875	Pdha,Fum1,muc,Scsalpha1,CG5214,Mdh2,mAcon1,CG17896,Pgk,Hex-A
2_Member	KEGG Pathway	dme00020	Citrate cycle (TCA cycle)	-4.5247	-2.55739	7/43	31406,31605,34021,38447,41360,42185,44149	Pdha,Fum1,muc,Scsalpha1,CG5214,Mdh2,mAcon1
2_Member	KEGG Pathway	ko00020	Citrate cycle (TCA cycle)	-4.5247	-2.55739	7/43	31406,31605,34021,38447,41360,42185,44149	Pdha,Fum1,muc,Scsalpha1,CG5214,Mdh2,mAcon1
2_Member	KEGG Pathway	dme01200	Carbon metabolism	-3.81803	-2.15175	10/114	30995,31406,31605,33461,34021,38447,41360,42185,44149,45875	CG17896,Pdha,Fum1,Pgk,muc,Scsalpha1,CG5214,Mdh2,mAcon1,Hex-A
2_Member	KEGG Pathway	ko01200	Carbon metabolism	-3.81803	-2.15175	10/114	30995,31406,31605,33461,34021,38447,41360,42185,44149,45875	CG17896,Pdha,Fum1,Pgk,muc,Scsalpha1,CG5214,Mdh2,mAcon1,Hex-A
2_Member	KEGG Pathway	M00009	Citrate cycle (TCA cycle, Krebs cycle)	-3.09877	-1.83042	5/35	31605,38447,41360,42185,44149	Fum1,Scsalpha1,CG5214,Mdh2,mAcon1
2_Member	KEGG Pathway	dme_M00009	Citrate cycle (TCA cycle, Krebs cycle)	-3.09877	-1.83042	5/35	31605,38447,41360,42185,44149	Fum1,Scsalpha1,CG5214,Mdh2,mAcon1
2_Member	KEGG Pathway	M00011	Citrate cycle, second carbon oxidation, 2-oxoglutarate => oxaloacetate	-2.89471	-1.66776	4/23	31605,38447,41360,42185	Fum1,Scsalpha1,CG5214,Mdh2
2_Member	KEGG Pathway	dme_M00011	Citrate cycle, second carbon oxidation, 2-oxoglutarate => oxaloacetate	-2.89471	-1.66776	4/23	31605,38447,41360,42185	Fum1,Scsalpha1,CG5214,Mdh2
3_Summary	KEGG Pathway	dme03013	RNA transport	-3.50661	-1.93724	11/148	32566,33226,35784,36037,36830,37005,38398,40589,41965,42816,43041	eIF5,lwr,Nup50,eIF3j,Nup62,eIF3c,eIF1,tacc,Bin1,Nup98-96,Nup358
3_Member	KEGG Pathway	dme03013	RNA transport	-3.50661	-1.93724	11/148	32566,33226,35784,36037,36830,37005,38398,40589,41965,42816,43041	eIF5,lwr,Nup50,eIF3j,Nup62,eIF3c,eIF1,tacc,Bin1,Nup98-96,Nup358
3_Member	KEGG Pathway	ko03013	RNA transport	-3.50661	-1.93724	11/148	32566,33226,35784,36037,36830,37005,38398,40589,41965,42816,43041	eIF5,lwr,Nup50,eIF3j,Nup62,eIF3c,eIF1,tacc,Bin1,Nup98-96,Nup358
4_Summary	KEGG Pathway	dme00410	beta-Alanine metabolism	-3.31998	-1.85455	4/18	30995,34256,41167,43244,32789,40059	CG17896,Aldh,SpdS,CG31075,scu,CG3902
4_Member	KEGG Pathway	dme00410	beta-Alanine metabolism	-3.31998	-1.85455	4/18	30995,34256,41167,43244	CG17896,Aldh,SpdS,CG31075
4_Member	KEGG Pathway	ko00410	beta-Alanine metabolism	-3.31998	-1.85455	4/18	30995,34256,41167,43244	CG17896,Aldh,SpdS,CG31075
4_Member	KEGG Pathway	dme00280	Valine, leucine and isoleucine degradation	-3.2198	-1.85455	5/33	30995,32789,34256,40059,43244	CG17896,scu,Aldh,CG3902,CG31075
4_Member	KEGG Pathway	ko00280	Valine, leucine and isoleucine degradation	-3.2198	-1.85455	5/33	30995,32789,34256,40059,43244	CG17896,scu,Aldh,CG3902,CG31075
5_Summary	KEGG Pathway	dme04141	Protein processing in endoplasmic reticulum	-3.27525	-1.85455	10/133	31849,34976,35056,36040,36270,37206,37744,39447,41166,43785	Ost48,CaBP1,GCS2beta,TER94,ERp60,wbl,l(2)efl,CG10973,Calr,Rad23
5_Member	KEGG Pathway	dme04141	Protein processing in endoplasmic reticulum	-3.27525	-1.85455	10/133	31849,34976,35056,36040,36270,37206,37744,39447,41166,43785	Ost48,CaBP1,GCS2beta,TER94,ERp60,wbl,l(2)efl,CG10973,Calr,Rad23
5_Member	KEGG Pathway	ko04141	Protein processing in endoplasmic reticulum	-3.27525	-1.85455	10/133	31849,34976,35056,36040,36270,37206,37744,39447,41166,43785	Ost48,CaBP1,GCS2beta,TER94,ERp60,wbl,l(2)efl,CG10973,Calr,Rad23
6_Summary	KEGG Pathway	dme03050	Proteasome	-3.11226	-1.83042	6/52	32047,34359,39628,40639,42805,46058	Rpt3,Prosalpha6,Prosbeta2,Prosbeta7,Rpt5,Prosbeta1
6_Member	KEGG Pathway	dme03050	Proteasome	-3.11226	-1.83042	6/52	32047,34359,39628,40639,42805,46058	Rpt3,Prosalpha6,Prosbeta2,Prosbeta7,Rpt5,Prosbeta1
6_Member	KEGG Pathway	ko03050	Proteasome	-3.11226	-1.83042	6/52	32047,34359,39628,40639,42805,46058	Rpt3,Prosalpha6,Prosbeta2,Prosbeta7,Rpt5,Prosbeta1
7_Summary	KEGG Pathway	dme00190	Oxidative phosphorylation	-2.44664	-1.25748	9/144	31950,37922,38154,38378,40679,42759,43829,45012,317928	ATPsyndelta,Nurf-38,ND-ACP,ND-30,Vha26,ATPsynCF6,ATPsynbeta,Vha68-2,ND-MLRQ
7_Member	KEGG Pathway	dme00190	Oxidative phosphorylation	-2.44664	-1.25748	9/144	31950,37922,38154,38378,40679,42759,43829,45012,317928	ATPsyndelta,Nurf-38,ND-ACP,ND-30,Vha26,ATPsynCF6,ATPsynbeta,Vha68-2,ND-MLRQ
7_Member	KEGG Pathway	ko00190	Oxidative phosphorylation	-2.44664	-1.25748	9/144	31950,37922,38154,38378,40679,42759,43829,45012,317928	ATPsyndelta,Nurf-38,ND-ACP,ND-30,Vha26,ATPsynCF6,ATPsynbeta,Vha68-2,ND-MLRQ
