# Supplementary material for: The molecular basis of socially induced egg-size plasticity in honey bees
Source: eLife. 2022 Nov 8;11:e80499. doi: 10.7554/eLife.80499 (PMC9747152; doi:10.7554/eLife.80499)
Supplement: Supplementary file 5. [file elife-80499-supp5.xlsx]

## Sheet: Sheet1
#node1	node2	node1_string_id	node2_string_id	neighborhood_on_chromosome	gene_fusion	phylogenetic_cooccurrence	homology	coexpression	experimentally_determined_interaction	database_annotated	automated_textmining	combined_score
Act5C	cib	7227.FBpp0100124	7227.FBpp0070607	0	0	0	0	0.107	0.709	0	0.918	0.977
Act5C	sqh	7227.FBpp0100124	7227.FBpp0070842	0	0	0	0	0.155	0.146	0	0.771	0.821
Act5C	Non2	7227.FBpp0100124	7227.FBpp0072839	0	0	0	0	0.045	0.251	0.21	0.094	0.419
Act5C	up	7227.FBpp0100124	7227.FBpp0073682	0	0	0	0	0.13	0.15	0	0.533	0.624
Act5C	Fim	7227.FBpp0100124	7227.FBpp0074217	0	0	0	0	0.052	0.603	0.136	0.742	0.905
Act5C	Arpc5	7227.FBpp0100124	7227.FBpp0077378	0	0	0	0	0.051	0.303	0.201	0.541	0.725
Act5C	Arp1	7227.FBpp0100124	7227.FBpp0082121	0	0	0	0.955	0.073	0.475	0	0.653	0.507
Act5C	Tm2	7227.FBpp0100124	7227.FBpp0082535	0	0	0	0	0.152	0.447	0	0.939	0.969
Act5C	CG5023	7227.FBpp0100124	7227.FBpp0083275	0	0	0	0	0.048	0.277	0	0.271	0.455
Act5C	Rho1	7227.FBpp0100124	7227.FBpp0086354	0	0	0	0	0.097	0.12	0.307	0.937	0.961
Act5C	chic	7227.FBpp0100124	7227.FBpp0089196	0	0	0	0	0.101	0.591	0	0.993	0.997
Act5C	TER94	7227.FBpp0100124	7227.FBpp0111818	0	0	0	0	0.048	0.12	0	0.49	0.535
Act5C	Cam	7227.FBpp0100124	7227.FBpp0293502	0	0	0	0	0.096	0.205	0	0.705	0.769
Act5C	alpha-Spec	7227.FBpp0100124	7227.FBpp0305100	0	0	0	0	0.091	0.497	0.307	0.528	0.831
Act5C	Rac1	7227.FBpp0100124	7227.FBpp0304252	0	0	0	0	0.073	0.42	0.224	0.664	0.841
Ank2	alpha-Spec	7227.FBpp0292244	7227.FBpp0305100	0	0	0	0	0.052	0.134	0	0.725	0.754
Arp1	Non2	7227.FBpp0082121	7227.FBpp0072839	0	0	0	0	0.093	0.251	0.21	0.094	0.449
Arp1	Fim	7227.FBpp0082121	7227.FBpp0074217	0	0	0	0	0.051	0.541	0.136	0.506	0.789
Arp1	Arpc5	7227.FBpp0082121	7227.FBpp0077378	0	0	0	0	0.1	0.303	0.201	0.245	0.571
Arp1	Rac1	7227.FBpp0082121	7227.FBpp0304252	0	0	0	0	0.045	0.12	0.214	0.21	0.408
Arp1	CG5023	7227.FBpp0082121	7227.FBpp0083275	0	0	0	0	0.048	0.277	0	0.211	0.409
Arp1	Act5C	7227.FBpp0082121	7227.FBpp0100124	0	0	0	0.955	0.073	0.475	0	0.653	0.507
Arp1	Tm2	7227.FBpp0082121	7227.FBpp0082535	0	0	0	0	0.052	0.447	0	0.248	0.571
Arp1	Rab1	7227.FBpp0082121	7227.FBpp0083503	0	0	0	0	0.049	0	0.6	0.079	0.619
Arp1	chic	7227.FBpp0082121	7227.FBpp0089196	0	0	0	0	0.049	0.538	0	0.378	0.703
Arp1	alpha-Spec	7227.FBpp0082121	7227.FBpp0305100	0	0	0	0	0	0.059	0.695	0.072	0.71
Arpc5	Fim	7227.FBpp0077378	7227.FBpp0074217	0	0	0	0	0.048	0.525	0	0.621	0.813
Arpc5	chic	7227.FBpp0077378	7227.FBpp0089196	0	0	0	0	0.083	0	0	0.533	0.554
Arpc5	Arp1	7227.FBpp0077378	7227.FBpp0082121	0	0	0	0	0.1	0.303	0.201	0.245	0.571
Arpc5	Rac1	7227.FBpp0077378	7227.FBpp0304252	0	0	0	0	0.05	0.046	0.6	0.284	0.705
Arpc5	Act5C	7227.FBpp0077378	7227.FBpp0100124	0	0	0	0	0.051	0.303	0.201	0.541	0.725
CG5023	up	7227.FBpp0083275	7227.FBpp0073682	0	0	0	0	0.552	0	0	0.054	0.558
CG5023	Fim	7227.FBpp0083275	7227.FBpp0074217	0	0	0	0	0.052	0.543	0	0.594	0.808
CG5023	Arp1	7227.FBpp0083275	7227.FBpp0082121	0	0	0	0	0.048	0.277	0	0.211	0.409
CG5023	Tm2	7227.FBpp0083275	7227.FBpp0082535	0	0	0	0	0.564	0.111	0	0.494	0.787
CG5023	Act5C	7227.FBpp0083275	7227.FBpp0100124	0	0	0	0	0.048	0.277	0	0.271	0.455
CG5023	chic	7227.FBpp0083275	7227.FBpp0089196	0	0	0	0	0.051	0.272	0	0.457	0.592
Cam	up	7227.FBpp0293502	7227.FBpp0073682	0	0	0	0	0.052	0.262	0	0.297	0.465
Cam	Tm2	7227.FBpp0293502	7227.FBpp0082535	0	0	0	0	0.052	0.126	0	0.595	0.635
Cam	Rho1	7227.FBpp0293502	7227.FBpp0086354	0	0	0	0	0.247	0.066	0	0.704	0.773
Cam	chic	7227.FBpp0293502	7227.FBpp0089196	0	0	0	0	0.154	0.049	0	0.424	0.497
Cam	Act5C	7227.FBpp0293502	7227.FBpp0100124	0	0	0	0	0.096	0.205	0	0.705	0.769
Cam	Rac1	7227.FBpp0293502	7227.FBpp0304252	0	0	0	0	0.143	0.066	0	0.489	0.555
Cam	alpha-Spec	7227.FBpp0293502	7227.FBpp0305100	0	0	0	0.7	0	0.61	0	0.218	0.632
Cnot4	TER94	7227.FBpp0304028	7227.FBpp0111818	0	0	0	0	0.098	0.051	0	0.421	0.461
Cp1	sqh	7227.FBpp0086719	7227.FBpp0070842	0	0	0	0	0.41	0.05	0	0	0.415
Fim	sqh	7227.FBpp0074217	7227.FBpp0070842	0	0	0	0	0.073	0.093	0	0.432	0.48
Fim	Rac1	7227.FBpp0074217	7227.FBpp0304252	0	0	0	0	0.131	0.066	0.114	0.348	0.469
Fim	Rho1	7227.FBpp0074217	7227.FBpp0086354	0	0	0	0	0.052	0.384	0.114	0.344	0.615
Fim	Arp1	7227.FBpp0074217	7227.FBpp0082121	0	0	0	0	0.051	0.541	0.136	0.506	0.789
Fim	CG5023	7227.FBpp0074217	7227.FBpp0083275	0	0	0	0	0.052	0.543	0	0.594	0.808
Fim	Arpc5	7227.FBpp0074217	7227.FBpp0077378	0	0	0	0	0.048	0.525	0	0.621	0.813
Fim	Act5C	7227.FBpp0074217	7227.FBpp0100124	0	0	0	0	0.052	0.603	0.136	0.742	0.905
Fim	Tm2	7227.FBpp0074217	7227.FBpp0082535	0	0	0	0	0.049	0.487	0	0.861	0.926
Fim	chic	7227.FBpp0074217	7227.FBpp0089196	0	0	0	0	0.116	0.088	0	0.931	0.94
Gbeta13F	Tcp-1zeta	7227.FBpp0089182	7227.FBpp0073902	0	0	0	0	0.048	0.051	0.6	0	0.607
Gbeta13F	Rho1	7227.FBpp0089182	7227.FBpp0086354	0	0	0	0	0.095	0.251	0.241	0.429	0.667
Gbeta13F	Rac1	7227.FBpp0089182	7227.FBpp0304252	0	0	0	0	0.12	0.251	0.328	0.509	0.753
Non2	Act5C	7227.FBpp0072839	7227.FBpp0100124	0	0	0	0	0.045	0.251	0.21	0.094	0.419
Non2	Arp1	7227.FBpp0072839	7227.FBpp0082121	0	0	0	0	0.093	0.251	0.21	0.094	0.449
Prosbeta7	Rho1	7227.FBpp0078448	7227.FBpp0086354	0	0	0	0	0.052	0.047	0	0.393	0.404
Prosbeta7	TER94	7227.FBpp0078448	7227.FBpp0111818	0	0	0	0	0.312	0.465	0	0.118	0.647
Rab1	Arp1	7227.FBpp0083503	7227.FBpp0082121	0	0	0	0	0.049	0	0.6	0.079	0.619
Rab1	alpha-Spec	7227.FBpp0083503	7227.FBpp0305100	0	0	0	0	0	0	0.6	0.069	0.611
Rac1	sqh	7227.FBpp0304252	7227.FBpp0070842	0	0	0	0	0.091	0.384	0.9	0.671	0.979
Rac1	Fim	7227.FBpp0304252	7227.FBpp0074217	0	0	0	0	0.131	0.066	0.114	0.348	0.469
Rac1	Arpc5	7227.FBpp0304252	7227.FBpp0077378	0	0	0	0	0.05	0.046	0.6	0.284	0.705
Rac1	Arp1	7227.FBpp0304252	7227.FBpp0082121	0	0	0	0	0.045	0.12	0.214	0.21	0.408
Rac1	Rho1	7227.FBpp0304252	7227.FBpp0086354	0	0	0.434	0.951	0.29	0.812	0.451	0.966	0.926
Rac1	Gbeta13F	7227.FBpp0304252	7227.FBpp0089182	0	0	0	0	0.12	0.251	0.328	0.509	0.753
Rac1	chic	7227.FBpp0304252	7227.FBpp0089196	0	0	0	0	0.122	0.655	0.268	0.82	0.954
Rac1	Act5C	7227.FBpp0304252	7227.FBpp0100124	0	0	0	0	0.073	0.42	0.224	0.664	0.841
Rac1	stai	7227.FBpp0304252	7227.FBpp0293447	0	0	0	0	0.073	0.052	0	0.392	0.419
Rac1	Cam	7227.FBpp0304252	7227.FBpp0293502	0	0	0	0	0.143	0.066	0	0.489	0.555
Rac1	alpha-Spec	7227.FBpp0304252	7227.FBpp0305100	0	0	0	0	0.09	0.052	0.328	0.163	0.45
Rho1	cib	7227.FBpp0086354	7227.FBpp0070607	0	0	0	0	0.241	0	0	0.269	0.421
Rho1	sqh	7227.FBpp0086354	7227.FBpp0070842	0	0	0	0	0.154	0.384	0.9	0.955	0.997
Rho1	Fim	7227.FBpp0086354	7227.FBpp0074217	0	0	0	0	0.052	0.384	0.114	0.344	0.615
Rho1	Prosbeta7	7227.FBpp0086354	7227.FBpp0078448	0	0	0	0	0.052	0.047	0	0.393	0.404
Rho1	Tm2	7227.FBpp0086354	7227.FBpp0082535	0	0	0	0	0.052	0.069	0	0.473	0.494
Rho1	Sip1	7227.FBpp0086354	7227.FBpp0086065	0	0	0	0	0	0.374	0.114	0.111	0.464
Rho1	stai	7227.FBpp0086354	7227.FBpp0293447	0	0	0	0	0	0.049	0	0.474	0.478
Rho1	Gbeta13F	7227.FBpp0086354	7227.FBpp0089182	0	0	0	0	0.095	0.251	0.241	0.429	0.667
Rho1	Cam	7227.FBpp0086354	7227.FBpp0293502	0	0	0	0	0.247	0.066	0	0.704	0.773
Rho1	alpha-Spec	7227.FBpp0086354	7227.FBpp0305100	0	0	0	0	0.079	0.052	0.69	0.457	0.833
Rho1	chic	7227.FBpp0086354	7227.FBpp0089196	0	0	0	0	0.351	0.064	0.268	0.848	0.923
Rho1	Rac1	7227.FBpp0086354	7227.FBpp0304252	0	0	0.434	0.951	0.29	0.812	0.451	0.966	0.926
Rho1	Act5C	7227.FBpp0086354	7227.FBpp0100124	0	0	0	0	0.097	0.12	0.307	0.937	0.961
Sip1	Rho1	7227.FBpp0086065	7227.FBpp0086354	0	0	0	0	0	0.374	0.114	0.111	0.464
TBPH	TER94	7227.FBpp0088568	7227.FBpp0111818	0	0	0	0	0.043	0.432	0	0.921	0.953
TER94	Prosbeta7	7227.FBpp0111818	7227.FBpp0078448	0	0	0	0	0.312	0.465	0	0.118	0.647
TER94	TBPH	7227.FBpp0111818	7227.FBpp0088568	0	0	0	0	0.043	0.432	0	0.921	0.953
TER94	chic	7227.FBpp0111818	7227.FBpp0089196	0	0	0	0	0.094	0.199	0	0.485	0.594
TER94	Act5C	7227.FBpp0111818	7227.FBpp0100124	0	0	0	0	0.048	0.12	0	0.49	0.535
TER94	Cnot4	7227.FBpp0111818	7227.FBpp0304028	0	0	0	0	0.098	0.051	0	0.421	0.461
Tcp-1zeta	Gbeta13F	7227.FBpp0073902	7227.FBpp0089182	0	0	0	0	0.048	0.051	0.6	0	0.607
Tm2	sqh	7227.FBpp0082535	7227.FBpp0070842	0	0	0	0	0.099	0.088	0	0.748	0.775
Tm2	l(2)efl	7227.FBpp0082535	7227.FBpp0072009	0	0	0	0	0.577	0.048	0	0	0.58
Tm2	up	7227.FBpp0082535	7227.FBpp0073682	0	0	0	0	0.999	0.626	0	0.992	0.999
Tm2	Fim	7227.FBpp0082535	7227.FBpp0074217	0	0	0	0	0.049	0.487	0	0.861	0.926
Tm2	Arp1	7227.FBpp0082535	7227.FBpp0082121	0	0	0	0	0.052	0.447	0	0.248	0.571
Tm2	Rho1	7227.FBpp0082535	7227.FBpp0086354	0	0	0	0	0.052	0.069	0	0.473	0.494
Tm2	Cam	7227.FBpp0082535	7227.FBpp0293502	0	0	0	0	0.052	0.126	0	0.595	0.635
Tm2	Zasp52	7227.FBpp0082535	7227.FBpp0099801	0	0	0	0	0.288	0.12	0	0.473	0.641
Tm2	CG5023	7227.FBpp0082535	7227.FBpp0083275	0	0	0	0	0.564	0.111	0	0.494	0.787
Tm2	chic	7227.FBpp0082535	7227.FBpp0089196	0	0	0	0	0.056	0.049	0	0.862	0.865
Tm2	Act5C	7227.FBpp0082535	7227.FBpp0100124	0	0	0	0	0.152	0.447	0	0.939	0.969
Zasp52	up	7227.FBpp0099801	7227.FBpp0073682	0	0	0	0	0.279	0	0	0.631	0.723
Zasp52	Tm2	7227.FBpp0099801	7227.FBpp0082535	0	0	0	0	0.288	0.12	0	0.473	0.641
alpha-Spec	up	7227.FBpp0305100	7227.FBpp0073682	0	0	0	0	0	0	0	0.444	0.444
alpha-Spec	Arp1	7227.FBpp0305100	7227.FBpp0082121	0	0	0	0	0	0.059	0.695	0.072	0.71
alpha-Spec	Rab1	7227.FBpp0305100	7227.FBpp0083503	0	0	0	0	0	0	0.6	0.069	0.611
alpha-Spec	Rho1	7227.FBpp0305100	7227.FBpp0086354	0	0	0	0	0.079	0.052	0.69	0.457	0.833
alpha-Spec	Act5C	7227.FBpp0305100	7227.FBpp0100124	0	0	0	0	0.091	0.497	0.307	0.528	0.831
alpha-Spec	Ank2	7227.FBpp0305100	7227.FBpp0292244	0	0	0	0	0.052	0.134	0	0.725	0.754
alpha-Spec	Cam	7227.FBpp0305100	7227.FBpp0293502	0	0	0	0.7	0	0.61	0	0.218	0.632
alpha-Spec	Rac1	7227.FBpp0305100	7227.FBpp0304252	0	0	0	0	0.09	0.052	0.328	0.163	0.45
chic	cib	7227.FBpp0089196	7227.FBpp0070607	0	0	0	0	0.568	0.477	0	0.682	0.922
chic	sqh	7227.FBpp0089196	7227.FBpp0070842	0	0	0	0	0.506	0.049	0	0.65	0.821
chic	Fim	7227.FBpp0089196	7227.FBpp0074217	0	0	0	0	0.116	0.088	0	0.931	0.94
chic	Arpc5	7227.FBpp0089196	7227.FBpp0077378	0	0	0	0	0.083	0	0	0.533	0.554
chic	Arp1	7227.FBpp0089196	7227.FBpp0082121	0	0	0	0	0.049	0.538	0	0.378	0.703
chic	Tm2	7227.FBpp0089196	7227.FBpp0082535	0	0	0	0	0.056	0.049	0	0.862	0.865
chic	CG5023	7227.FBpp0089196	7227.FBpp0083275	0	0	0	0	0.051	0.272	0	0.457	0.592
chic	Rho1	7227.FBpp0089196	7227.FBpp0086354	0	0	0	0	0.351	0.064	0.268	0.848	0.923
chic	Cam	7227.FBpp0089196	7227.FBpp0293502	0	0	0	0	0.154	0.049	0	0.424	0.497
chic	TER94	7227.FBpp0089196	7227.FBpp0111818	0	0	0	0	0.094	0.199	0	0.485	0.594
chic	Rac1	7227.FBpp0089196	7227.FBpp0304252	0	0	0	0	0.122	0.655	0.268	0.82	0.954
chic	Act5C	7227.FBpp0089196	7227.FBpp0100124	0	0	0	0	0.101	0.591	0	0.993	0.997
cib	Rho1	7227.FBpp0070607	7227.FBpp0086354	0	0	0	0	0.241	0	0	0.269	0.421
cib	sqh	7227.FBpp0070607	7227.FBpp0070842	0	0	0	0	0.371	0	0	0.2	0.475
cib	chic	7227.FBpp0070607	7227.FBpp0089196	0	0	0	0	0.568	0.477	0	0.682	0.922
cib	Act5C	7227.FBpp0070607	7227.FBpp0100124	0	0	0	0	0.107	0.709	0	0.918	0.977
l(2)efl	up	7227.FBpp0072009	7227.FBpp0073682	0	0	0	0	0.54	0	0	0	0.54
l(2)efl	Tm2	7227.FBpp0072009	7227.FBpp0082535	0	0	0	0	0.577	0.048	0	0	0.58
sqh	cib	7227.FBpp0070842	7227.FBpp0070607	0	0	0	0	0.371	0	0	0.2	0.475
sqh	Cp1	7227.FBpp0070842	7227.FBpp0086719	0	0	0	0	0.41	0.05	0	0	0.415
sqh	Fim	7227.FBpp0070842	7227.FBpp0074217	0	0	0	0	0.073	0.093	0	0.432	0.48
sqh	up	7227.FBpp0070842	7227.FBpp0073682	0	0	0	0	0.092	0.16	0	0.672	0.728
sqh	Tm2	7227.FBpp0070842	7227.FBpp0082535	0	0	0	0	0.099	0.088	0	0.748	0.775
sqh	Act5C	7227.FBpp0070842	7227.FBpp0100124	0	0	0	0	0.155	0.146	0	0.771	0.821
sqh	chic	7227.FBpp0070842	7227.FBpp0089196	0	0	0	0	0.506	0.049	0	0.65	0.821
sqh	Rac1	7227.FBpp0070842	7227.FBpp0304252	0	0	0	0	0.091	0.384	0.9	0.671	0.979
sqh	Rho1	7227.FBpp0070842	7227.FBpp0086354	0	0	0	0	0.154	0.384	0.9	0.955	0.997
stai	Rho1	7227.FBpp0293447	7227.FBpp0086354	0	0	0	0	0	0.049	0	0.474	0.478
stai	tacc	7227.FBpp0293447	7227.FBpp0291772	0	0	0	0	0.12	0	0	0.559	0.596
stai	Rac1	7227.FBpp0293447	7227.FBpp0304252	0	0	0	0	0.073	0.052	0	0.392	0.419
tacc	stai	7227.FBpp0291772	7227.FBpp0293447	0	0	0	0	0.12	0	0	0.559	0.596
up	sqh	7227.FBpp0073682	7227.FBpp0070842	0	0	0	0	0.092	0.16	0	0.672	0.728
up	l(2)efl	7227.FBpp0073682	7227.FBpp0072009	0	0	0	0	0.54	0	0	0	0.54
up	alpha-Spec	7227.FBpp0073682	7227.FBpp0305100	0	0	0	0	0	0	0	0.444	0.444
up	Cam	7227.FBpp0073682	7227.FBpp0293502	0	0	0	0	0.052	0.262	0	0.297	0.465
up	CG5023	7227.FBpp0073682	7227.FBpp0083275	0	0	0	0	0.552	0	0	0.054	0.558
up	Act5C	7227.FBpp0073682	7227.FBpp0100124	0	0	0	0	0.13	0.15	0	0.533	0.624
up	Zasp52	7227.FBpp0073682	7227.FBpp0099801	0	0	0	0	0.279	0	0	0.631	0.723
up	Tm2	7227.FBpp0073682	7227.FBpp0082535	0	0	0	0	0.999	0.626	0	0.992	0.999
