# Supplementary material for: The molecular basis of socially induced egg-size plasticity in honey bees
Source: eLife. 2022 Nov 8;11:e80499. doi: 10.7554/eLife.80499 (PMC9747152; doi:10.7554/eLife.80499)
Supplement: Supplementary file 6. [file elife-80499-supp6.xlsx]

## Sheet: Sheet1
	Large colony						Small colony
	Control			-Rho1			Control			-Rho1
	Q1	Q2	Q3	Q4	Q5	Q6	Q7	Q8	Q9	Q10	Q11	Q12
Egg size (mm2)	0.534086	0.527799	0.543728	0.495219	0.476052	0.498166	0.658432	0.637329	0.652421	0.604455	0.60588	0.604318
Arfgap3	19.31	18.92	19.17	19.79	19.73	19.48	19.93	19.13	20.6	18.74	19.25	19.66
	19.22	19.19	19.62	20.23	20.08	19.62	19.82	19.76	19.91	19.02	19.8	19.68
	19.33	18.82	19.25	20.47	19.67	19.46	19.52	19.35	19.94	18.76	19.95	19.89
CylD	19.98	19.86	20.02	21.67	20.65	20.71	20.82	19.96	21.51	19.95	20.32	20.44
	19.83	19.88	19.88	21.09	20.67	20.53	21.03	20.57	21.63	19.99	19.93	20.17
	19.84	19.72	19.96	21.29	20.68	20.8	20.66	19.99	21.71	19.34	20.43	20.79
Rho1	20.43	20.39	20.45	22.21	21.65	21.47	20.09	19.84	20.41	19.74	19.99	20.54
	20.64	20.64	20.47	22.59	22.33	21.48	20.14	19.61	20.73	19.34	20.38	20.57
	20.62	20.29	20.64	22.16	22.08	21.97	19.81	19.41	20.54	19.81	20.41	20.21
