# Supplementary material for: The molecular basis of socially induced egg-size plasticity in honey bees
Source: eLife. 2022 Nov 8;11:e80499. doi: 10.7554/eLife.80499 (PMC9747152; doi:10.7554/eLife.80499)
Supplement: Supplementary file 7. [file elife-80499-supp7.xlsx]

## Sheet: Sheet1
	Q1	Q2	Q3	Q4	Q5	Q6	Q7	Q8	Q9	Q10	Q11	Q12
Egg size (mm2)	0.50076	0.506922	0.524075	0.537422	0.548935	0.576615	0.643266	0.65991	0.668674	0.668754	0.681281	0.710831
Arfgap3	20.35	20.27	19.84	20.69	21.49	20.48	20.96	19.78	20.37	20.97	20.91	20.54
	20.33	20.19	19.94	20.75	20.81	20.5	21.62	19.76	20.15	20.27	20.68	20.95
	20.24	20.64	20.21	21.1	21.25	20.64	20.93	20.04	20.78	20.82	20.7	20.84
CylD	20.85	20.9	20.9	21.69	22.11	21.55	22.05	21.01	21.59	20.95	21.19	22.05
	20.86	20.98	20.74	21.7	22.31	21.82	21.83	20.36	21.01	21.45	21.81	21.68
	21	21.04	20.88	21.67	22.69	21.73	22.13	20.97	20.98	21.34	21.46	21.84
Rho1	18.52	18.63	18.39	19.22	19.34	18.84	18.83	17.6	18.03	18.21	18.16	18.05
	18.84	18.99	18.65	19.29	19.74	18.97	19.03	17.86	18.2	18.49	18.47	17.72
	18.32	18.49	18.23	18.98	19.96	19.12	18.92	17.58	17.93	18.09	17.96	17.99
