# Supplementary material for: The molecular basis of socially induced egg-size plasticity in honey bees
Source: eLife. 2022 Nov 8;11:e80499. doi: 10.7554/eLife.80499 (PMC9747152; doi:10.7554/eLife.80499)
Supplement: Supplementary file 8. [file elife-80499-supp8.xlsx]

## Sheet: Sheet1
siRNA	sense (5'-3')	antisense (5'-3')
Rho1-siRNA-1	GGCAGCCAUUAGAAAGAAATT	UUUCUUUCUAAUGGCUGCCTT
Rho1-siRNA-2	GCCCAAAUGUGCCCAUUAUTT	AUAAUGGGCACAUUUGGGCTT
Rho1-siRNA-3	GGAAGGUAUUAGGGAAGUATT	UACUUCCCUAAUACCUUCCTT
Rho1-siRNA-4	GAUGUUGGCUCCUAUAAUUTT	AAUUAUAGGAGCCAACAUCTT
scramble siRNA	UUCUCCGAACGUGUCACGUTT	ACGUGACACGUUCGGAGAATT
Gene	sense (5'-3')	antisense (5'-3')
Rho1(GB47431)	AAACAAGTGGAACTGGCTCT	CAGGGAATCTGGACTATCAA
GAPDH (GB50902)	GATGCACCCATGTTTGTTTG	TTTGCAGAAGGTGCATCAAC
Kto (GB45373)	TCAACCAGCACCACCATACC	TGTTGCCTCATACGTTGTTGG
Keap1 (GB41840)	TCAAGAGATTGGGAGTTGGAG	CATTCATCATTTTCAGGATGG
CylD (GB45155)	ACAAATGCCACGATTTGGA	TTTCCGCAAACAGTACATTGTC
Arfgap3 (GB48600)	CCAAAGCAACACAAGCAGAA	TTATTGTTCTCATATCACCAAGTGC
RpA-70 (GB44421)	TTCAGGTAGAGAATTAAGGAAACGA	TTCAGCTTGTGATCCCCATA
mRPL44 (GB53201)	GCATGGTTGCATATTGGAACA	CGCTCCCACAAGTGCTAGA
Rpn2 (GB52526)	CGCCTGTAATGGAAACTGAAA	ACACGTTCTTGTTGCTCACG
